# Supplementary material for: Hybrid benzylidene thiazolidine-2,4-diones as potent apoptosis-inducing anticancer agents: design-driven optimization, cytotoxic profiling, and mechanistic validation in prostate cancer
Source: Royal Society of Chemistry journal article supplement (doi:10.1039/d6ra01323f), 2026-04-12
Supplement: d6ra01323f1.pdf [file d6ra01323f1.pdf]

Supporting Information

**Hybrid Benzylidene Thiazolidine-2,4-diones as Potent Apoptosis-Inducing Anticancer Agents: Design-Driven Optimization, Cytotoxic Profiling, and Mechanistic Validation in Prostate Cancer**

Saad Shaaban<sup>1,‡</sup>, Samia S. Hawas<sup>2,‡</sup>, Marwa Sharaky<sup>3</sup>, Hussein Ba-Ghazal<sup>1</sup>, Ayman Abo Elmaaty<sup>4,5</sup>, Khadra B. Alomari<sup>6</sup>, Mohamed Alaasar<sup>7</sup>, Asma M. Elsharif<sup>8</sup>, Fatema S. Alatawi<sup>9</sup>, Mohamed Alaa Mohamed<sup>10</sup>, Arwa Omar Al Khatib<sup>11</sup>, Ahmed A. Al-Karmalawy<sup>2,12\*</sup>

<sup>1</sup> Department of Chemistry, College of Science, King Faisal University, Al-Ahsa 31982, Saudi Arabia.

<sup>2</sup> Department of Pharmaceutical Chemistry, Faculty of Pharmacy, Horus University-Egypt, New Damietta 34518, Egypt.

<sup>3</sup> Cancer Biology Department, National Cancer Institute (NCI), Cairo University, Cairo, Egypt.

<sup>4</sup> Medicinal Chemistry Department, Faculty of Pharmacy, Port Said University, Port Said 42526, Egypt.

<sup>5</sup> Medicinal Chemistry Department, Clinical Pharmacy Program, East Port Said National University, Port Said 42526, Egypt.

<sup>6</sup> Jazan University, Department of Physical Sciences, Chemistry Division, P.O. Box 114, 45142, Jazan, Kingdom of Saudi Arabia.

<sup>7</sup> Department of Chemistry, Faculty of Science, Cairo University, Giza, Egypt.

<sup>8</sup> Department of Chemistry, College of Science, Imam Abdulrahman Bin Faisal University, Dammam 31441, Saudi Arabia.

<sup>9</sup> Department of Biochemistry, Faculty of Science, University of Tabuk, Tabuk, Saudi Arabia.

<sup>10</sup> Department of Chemistry, Faculty of Science, Mansoura University, Mansoura, Egypt

<sup>11</sup> Faculty of Pharmacy, Al-Ahliyya Amman University, Amman, Jordan.

<sup>12</sup> Department of Pharmaceutical Chemistry, College of Pharmacy, The University of Mashreq, Baghdad 10023, Iraq.

\*Corresponding authors:

**Ahmed A. Al-Karmalawy**; Email: [akarmalawy@horus.edu.eg](mailto:akarmalawy@horus.edu.eg)

**Saad Shaaban**; Email: [sibrahim@kfu.edu.sa](mailto:sibrahim@kfu.edu.sa)

‡: These authors contributed equally.

**Chemistry: Methods and Materials**

All solvents and reagents were purchased from Sigma Aldrich and were used without any prior purifications. Melting points (MP) in °C were recorded on the Gallenkamp instrument. The IR spectra (KBr,  $\nu$  cm<sup>-1</sup>) were recorded at King Faisal University on a Mattson 5000 FTIR Spectrophotometer.

The structure characterization of the prepared materials is based on <sup>1</sup>H-NMR, <sup>13</sup>C-NMR (Agilent Technologies 500 and 600 MHz VNMRS in DMSO-d<sub>6</sub> and pyridine-d<sub>5</sub> solution, with tetramethylsilane as internal standard. The high-resolution mass spectra were measured at Martin Luther University, Halle, Germany, on Thermo Scientific Q Exactive Plus mit HESI, APCI, sowie LIFDI-Quelle (Linden CMS).

***Synthesis of 4-phenylthiazol-2-amine (3)***<sup>1</sup>

A mixture of phenacyl bromide (3 mmol) and thiourea (3.6 mmol) in EtOH (15 mL) was refluxed for 4 h. After cooling, the resulting precipitate was filtered, washed with water, and dried to give the compound 3 as a white solid in 99 % yield, mp 150-152 °C (Lit. 149-150 °C).

***Synthesis of 2-chloro-N-(4-phenylthiazol-2-yl)acetamide (4)***<sup>2</sup>

To a solution of 4-phenylthiazol-2-amine (3) (1 mmol) in dichloromethane (15 ml), triethylamine (50  $\mu$ l) was added while stirring at room temperature. The mixture was then cooled to 0-5 °C and then chloroacetyl chloride (1.5 mmol) was added dropwise, and the mixture was stirred for 1 h, and then for 3 h at room temperature. After completion, water (30 mL) was added, and the reaction was extracted 3 times with saturated brine. The organic layers were combined, dried over anhydrous sodium sulfate, evaporated to dryness to give a white solid, yield: 89%, m.p.141-142 °C (Lit. 143-144 °C).

***Synthesis of Thiazolidine-2,4-dione***<sup>3</sup>

A mixture of thiourea (100 mmol) and monochloroacetic acid (100 mmol) was dissolved in distilled water (250 mL) and then refluxed for 3 days. The mixture was then cooled, and the resulting white crystals were isolated and dried.

***Synthesis of Potassium salt of 2,4-thiazolidinediones***<sup>3</sup>

Thiazolidine-2,4-dione (8 g) was dissolved in 12.5 ml of ethanol. To this solution, KOH (4.2 g) in ethanol (10 mL) was added. The mixture was stirred for 2 h. The white crystalline solid

## Supporting Information

was collected after filtration, washed with ethanol, and dried under vacuum to get the potassium salt of thiazolidinedione.

### Spectroscopic Data

#### *1-phenyl-3-(4-phenylthiazol-2-yl)thiourea (HB169)*

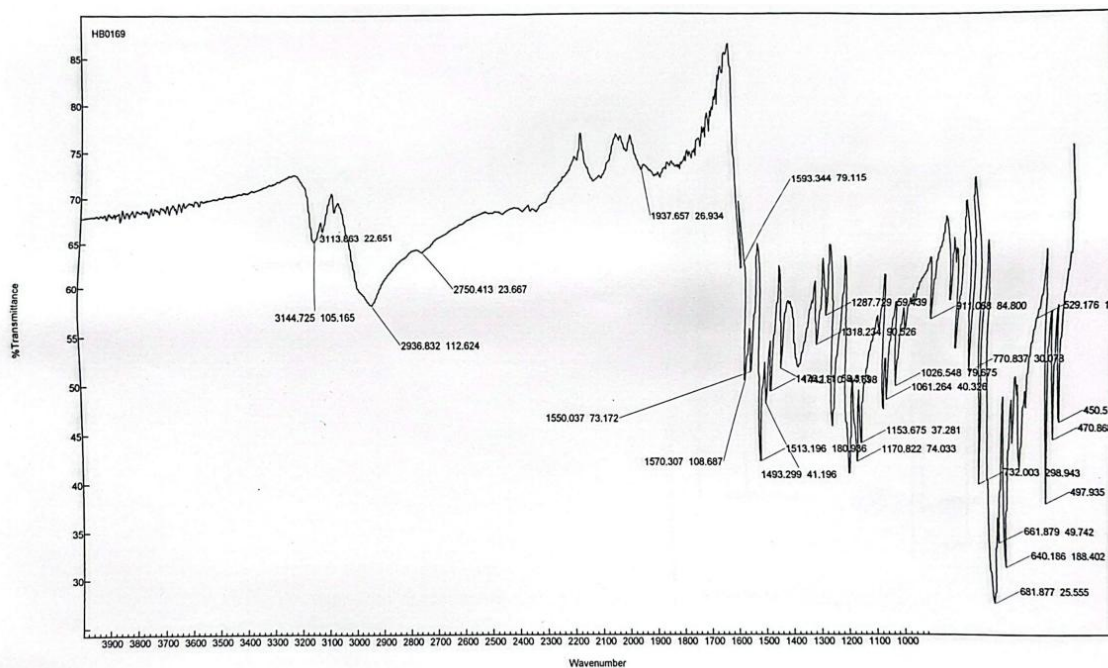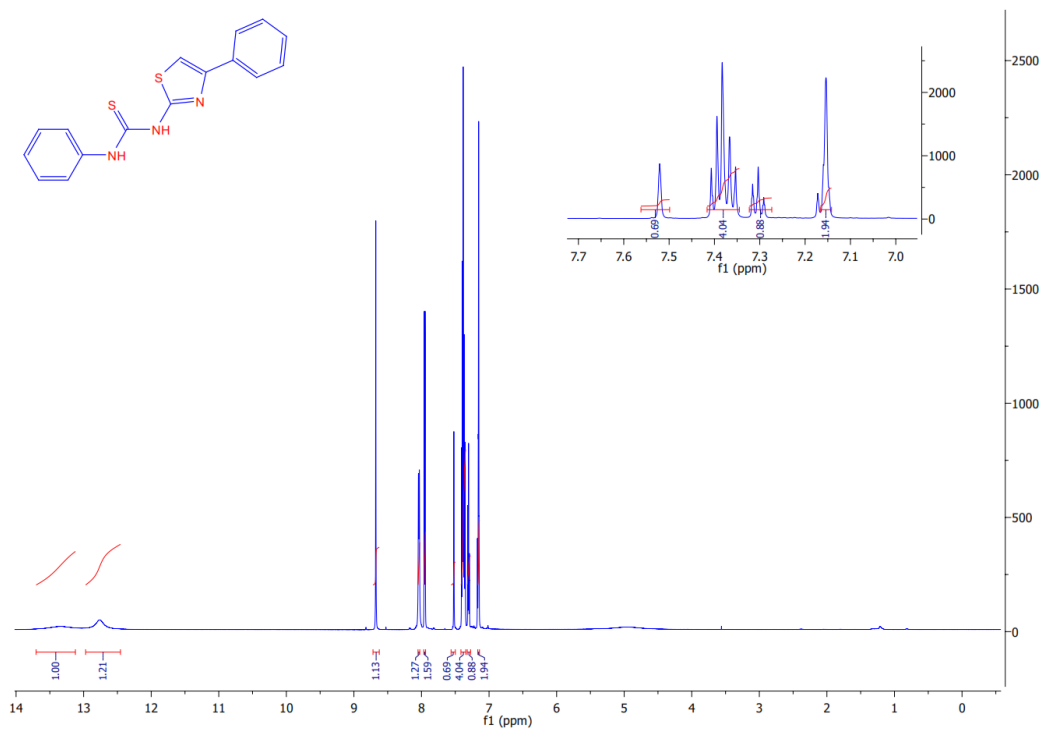

# Supporting Information

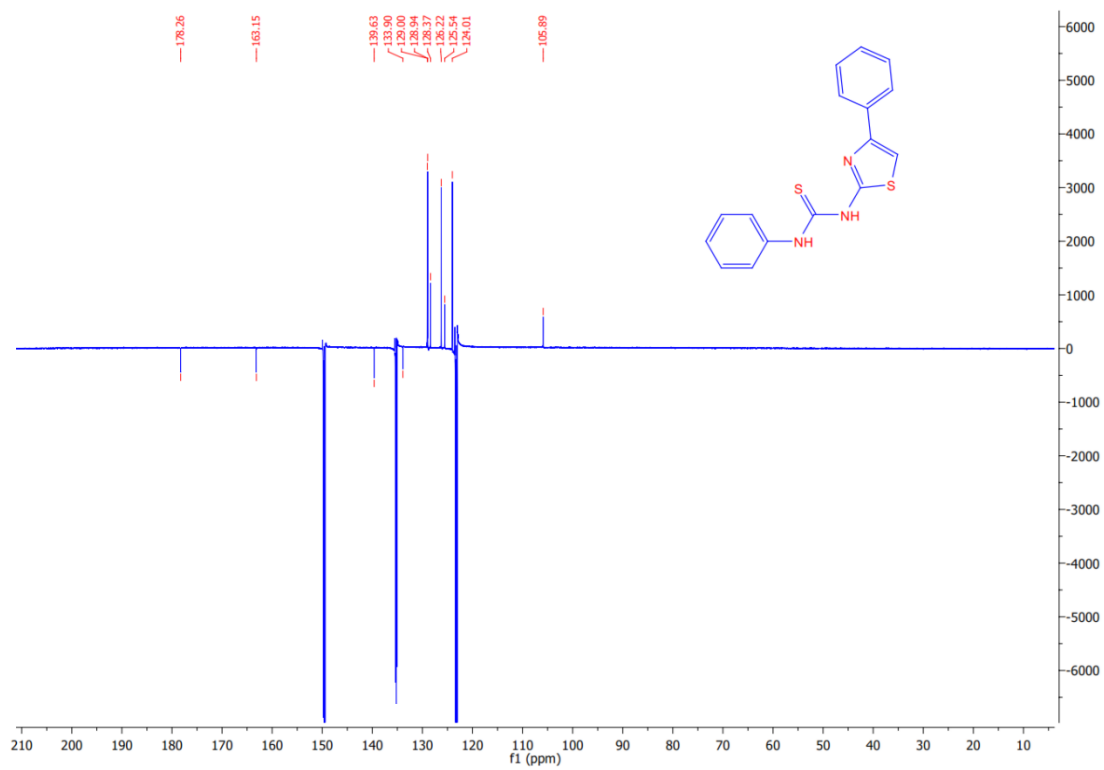

Spectrum RT 0:41 - 1:14 (63 scans) - Background Subtracted 0 - 0:40  
Alaasar-HB169-2\_Scan2\_is2.datx 2025.01.15 09:43:53 ;  
ESI + Max: 1.2E6

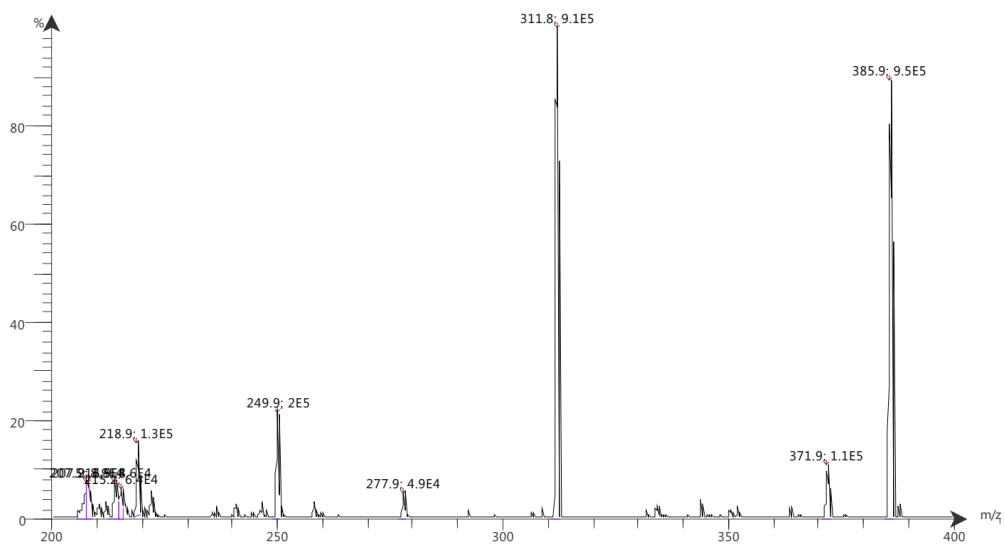

# Supporting Information

Spectrum RT 0:38 - 1:21 (83 scans) - Background Subtracted 0 - 0:38  
Alaasar-HB169-2\_Scan1\_is1.datx 2025.01.15 09:43:53 ;  
ESI - Max: 1.6E7

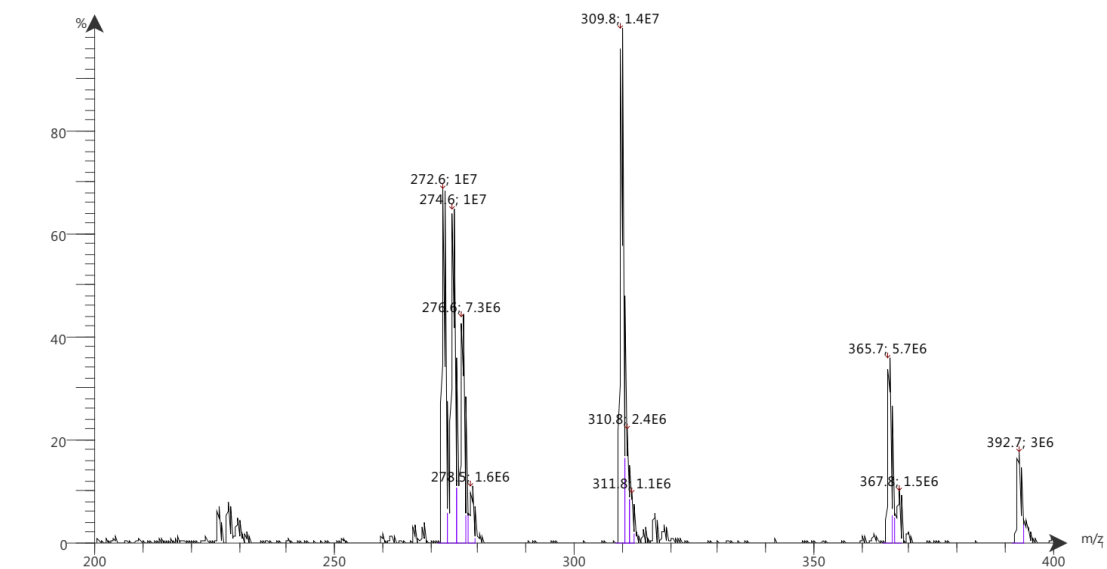



# Supporting Information

HB045 #1-100 RT: 0.00-0.45 AV: 100 NL: 2.97E8

T: FTMS + p ESI Full ms [150.0000-2000.0000]

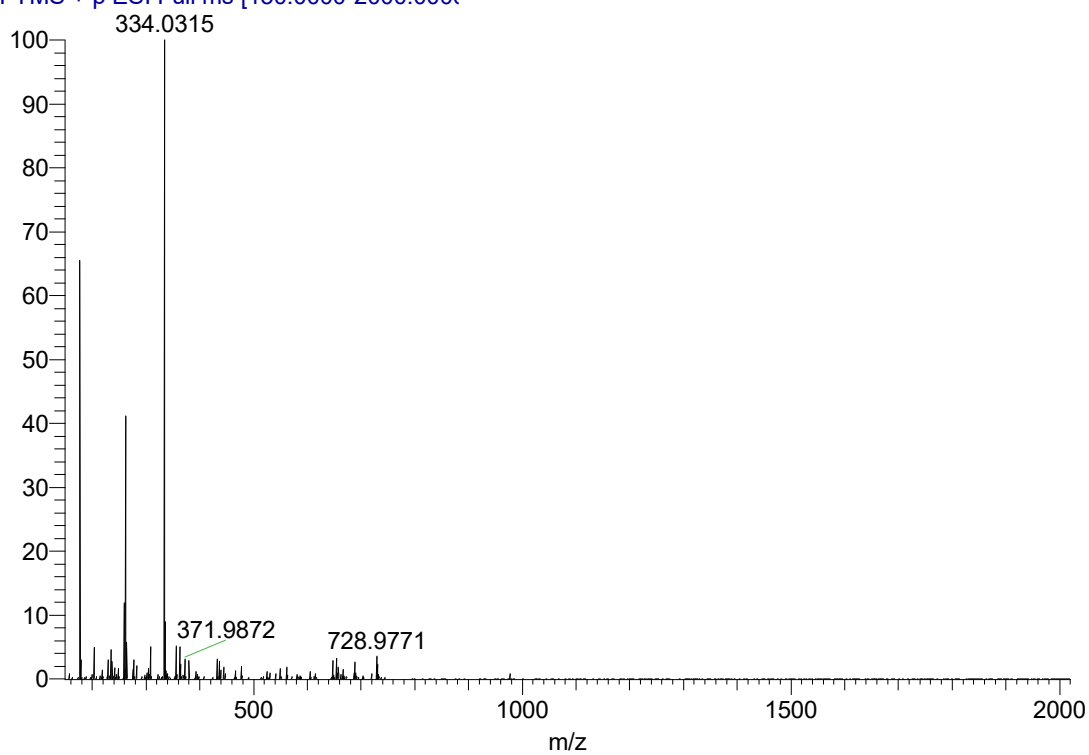

HB045 #1-100 RT: 0.00-0.45 AV: 100 NL: 2.97E8

T: FTMS + p ESI Full ms [150.0000-2000.0000]

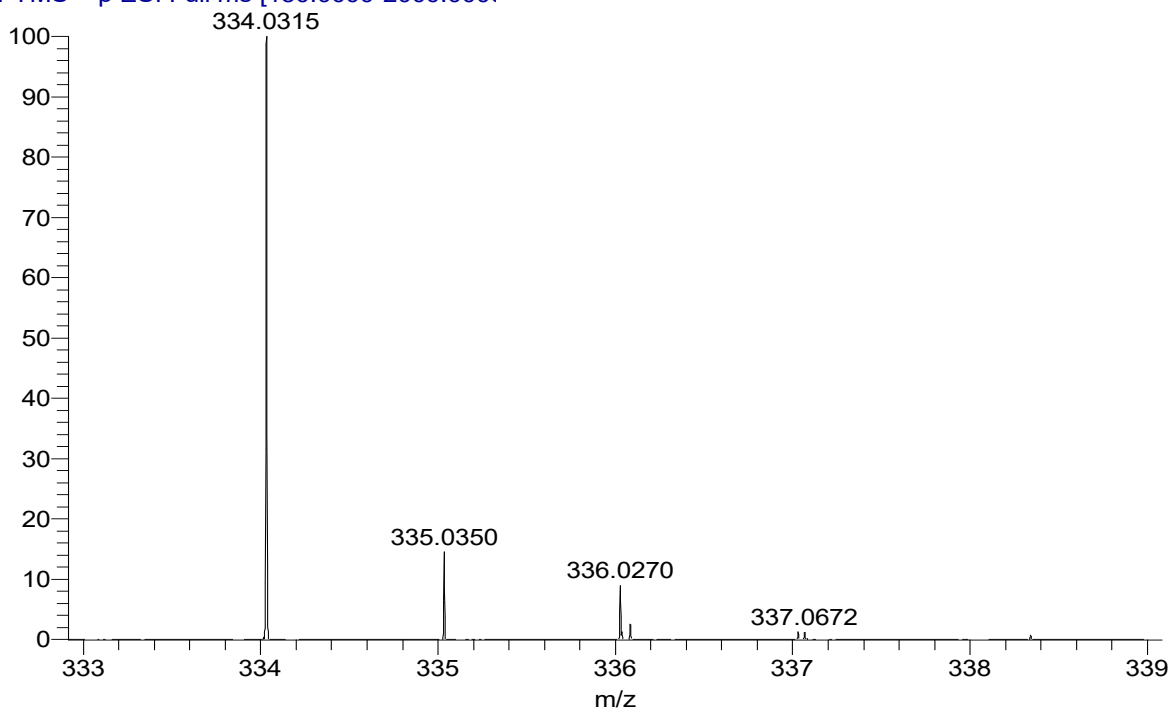

Supporting Information

**2-(5-benzylidene-2,4-dioxothiazolidin-3-yl)-N-(4-phenylthiazol-2-yl)acetamide (HB162)**

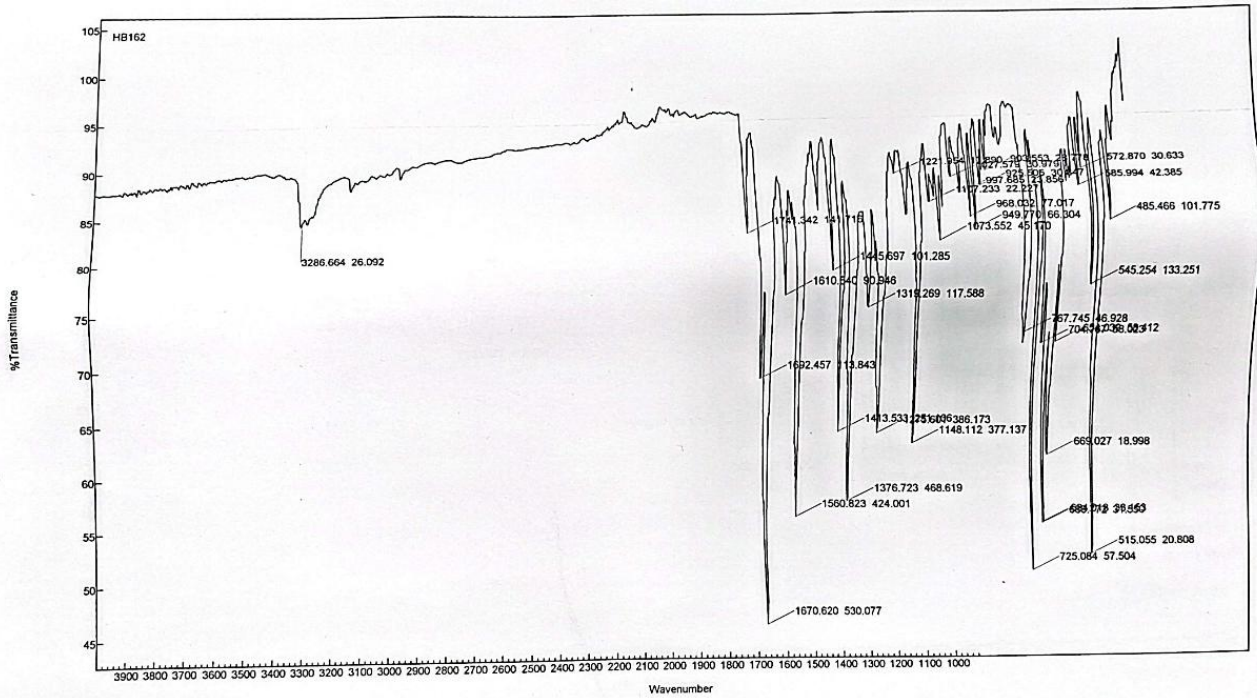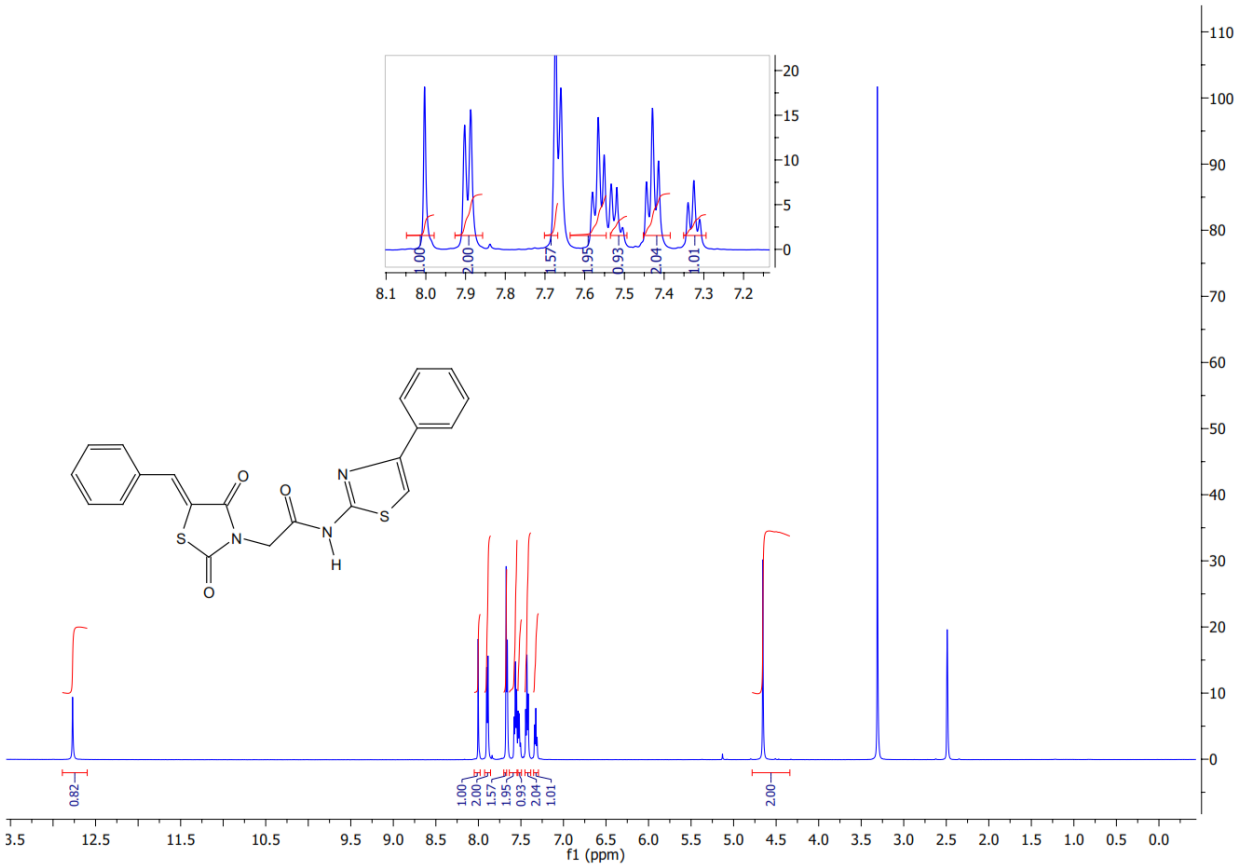

# Supporting Information

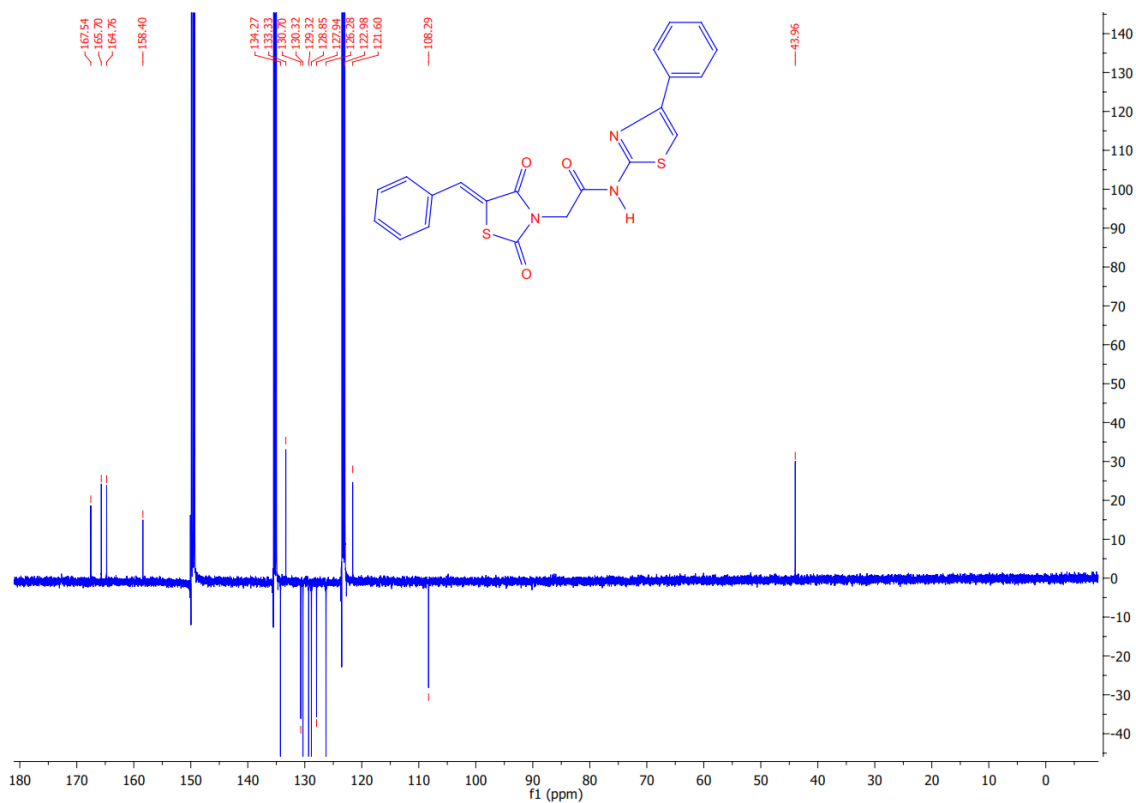

HB162 #1-100 RT: 0.00-0.45 AV: 100 NL: 1.79E7  
T: FTMS + p ESI Full ms [150.0000-2000.0000]

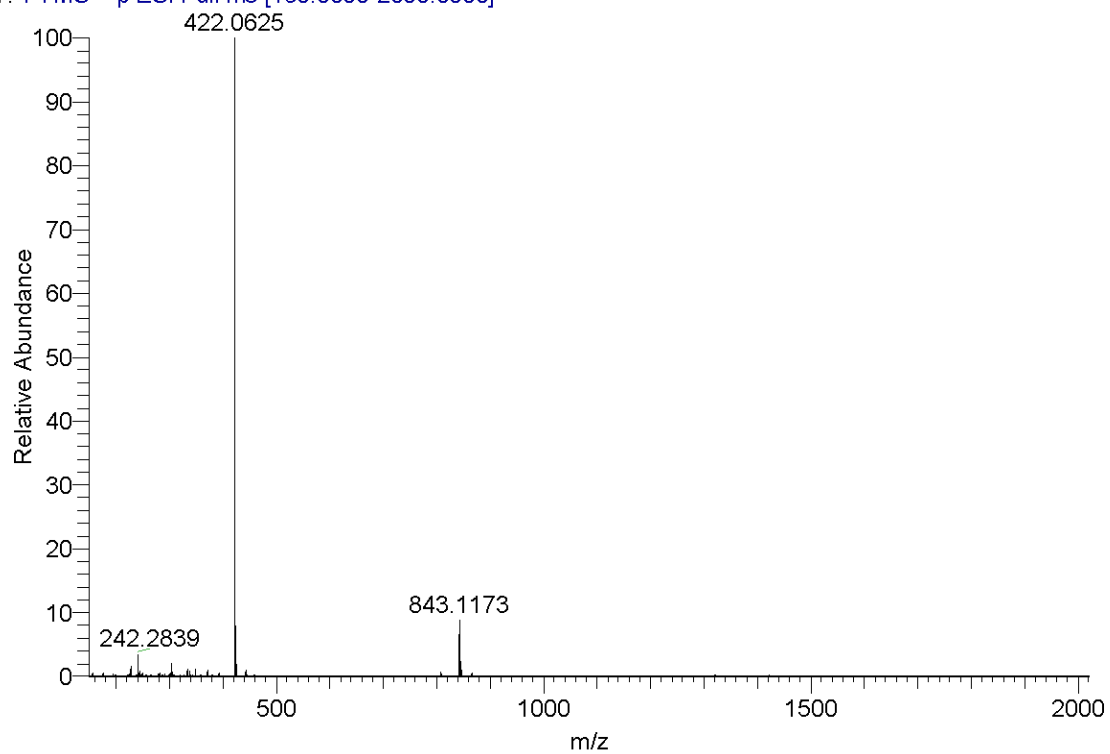

# Supporting Information

HB162 #1-100 RT: 0.00-0.45 AV: 100 NL: 1.79E7  
T: FTMS + p ESI Full ms [150.0000-2000.0000]

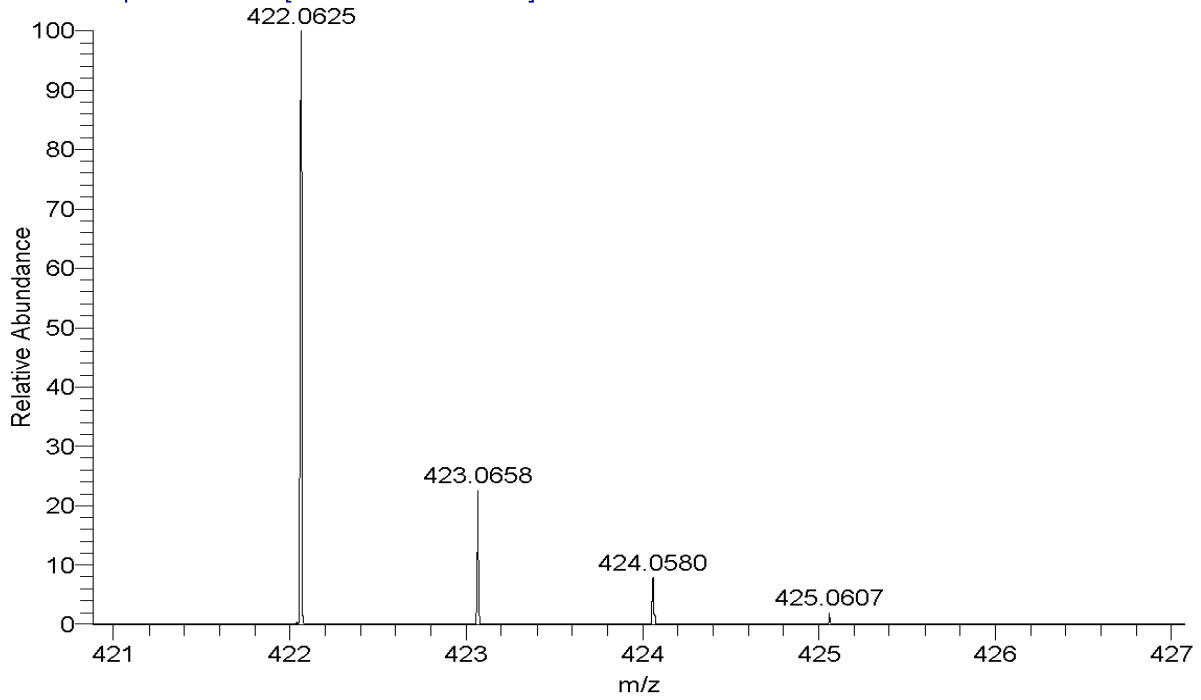

Spectrum RT 0:37 - 1:13 (69 scans) - Background Subtracted 0 - 0:37  
Alaasar-HB162-2\_Scan2\_is2.datx 2025.01.15 09:22:19 ;  
ESI + Max: 4.1E6

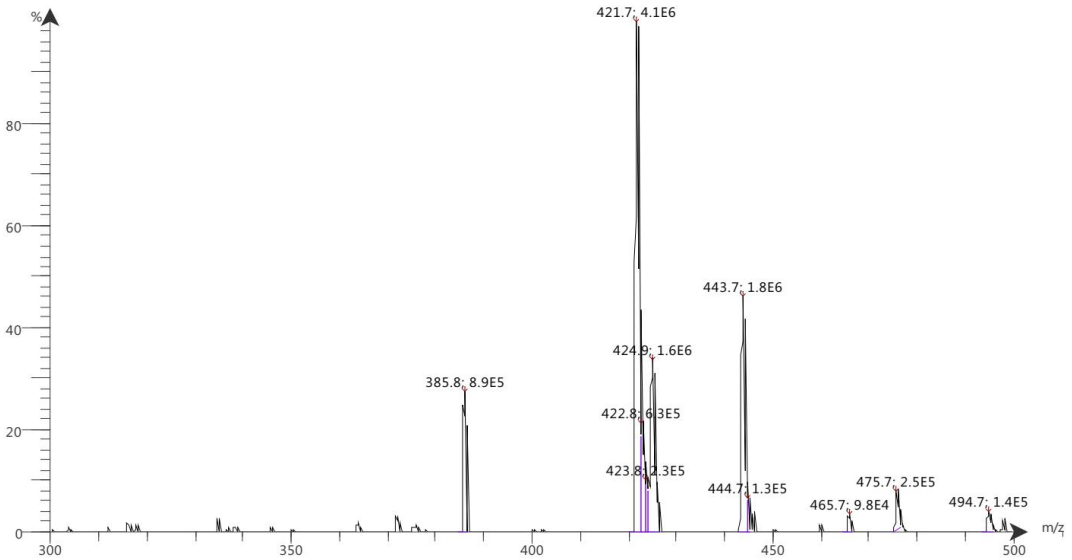

# Supporting Information

Spectrum RT 0:33 - 1:21 (11 scans) - Background Subtracted 0 - 0:29  
Alaasar-HB162-1\_Scan1\_is1.datx 2025.01.15 09:17:55 ;  
ESI - Max: 7.1E7

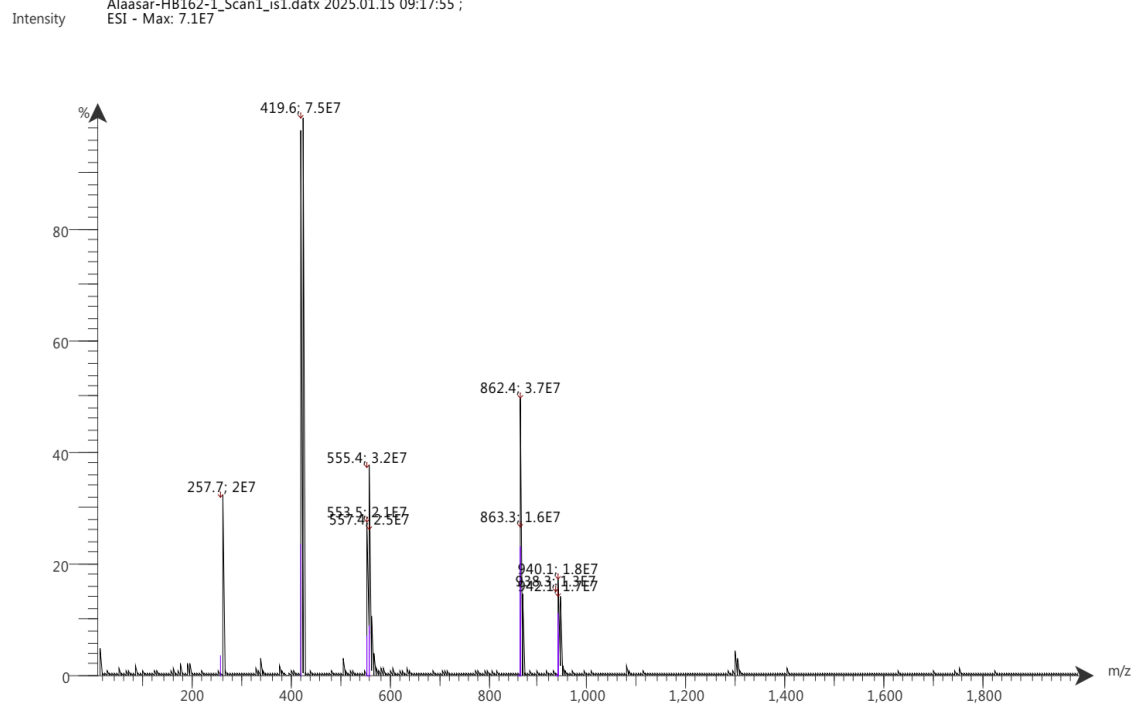



# Supporting Information

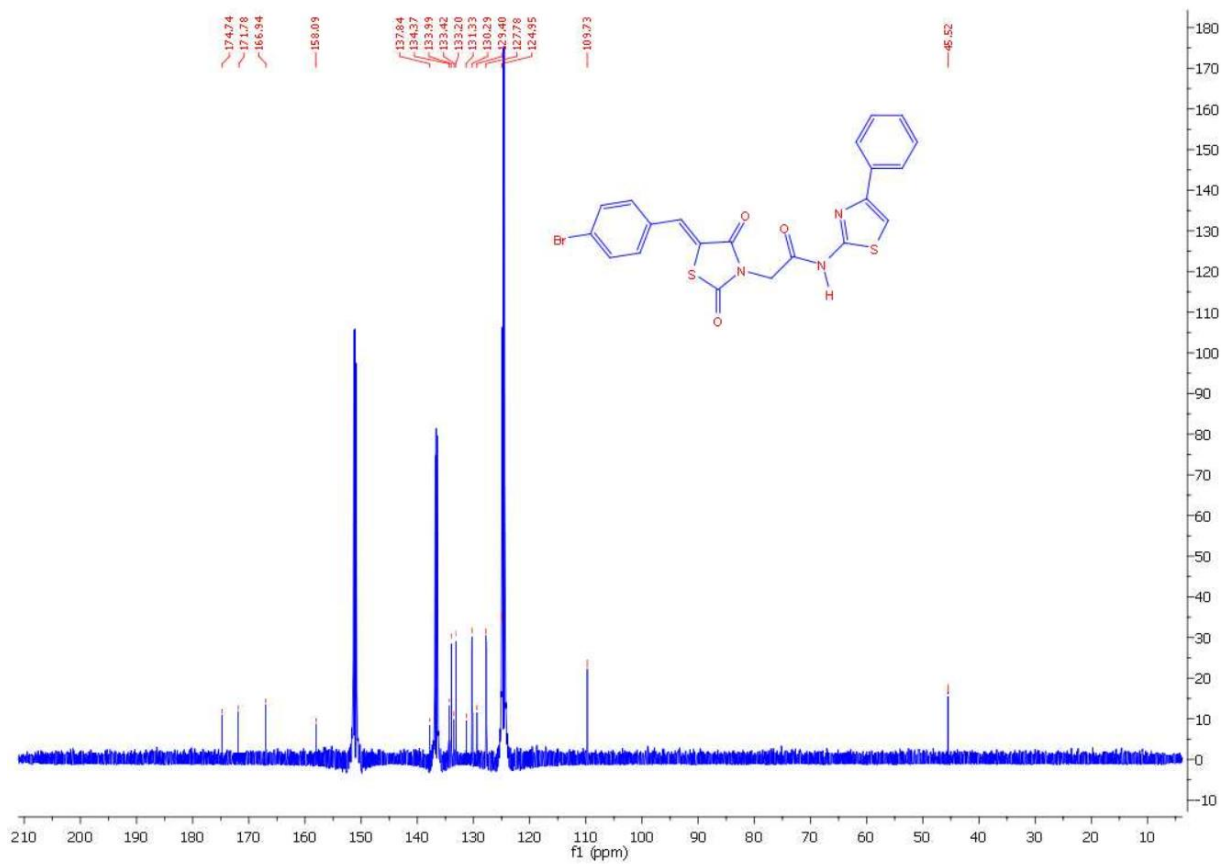

HB161 #1-100 RT: 0.00-0.45 AV: 100 NL: 1.08E8  
T: FTMS + p ESI Full ms [150.0000-2000.0000]

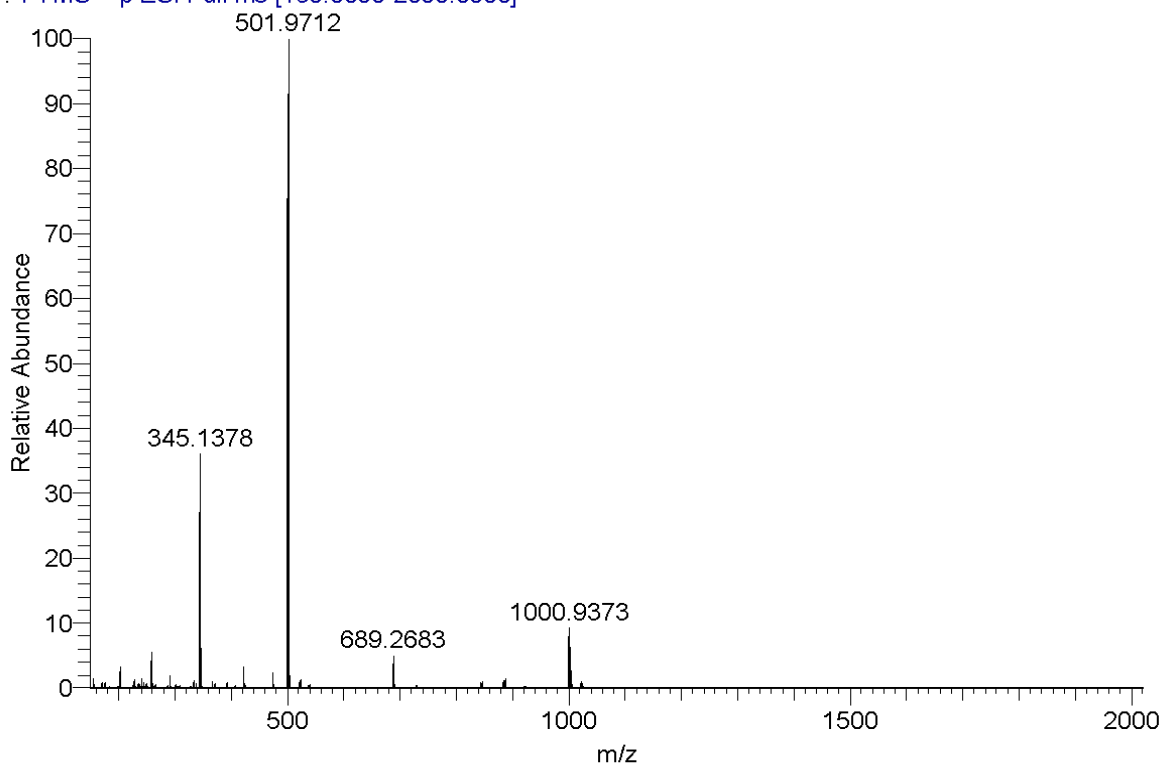

Supporting Information

HB161 #1-100 RT: 0.00-0.45 AV: 100 NL: 1.08E8  
T: FTMS + p ESI Full ms [150.0000-2000.0000]

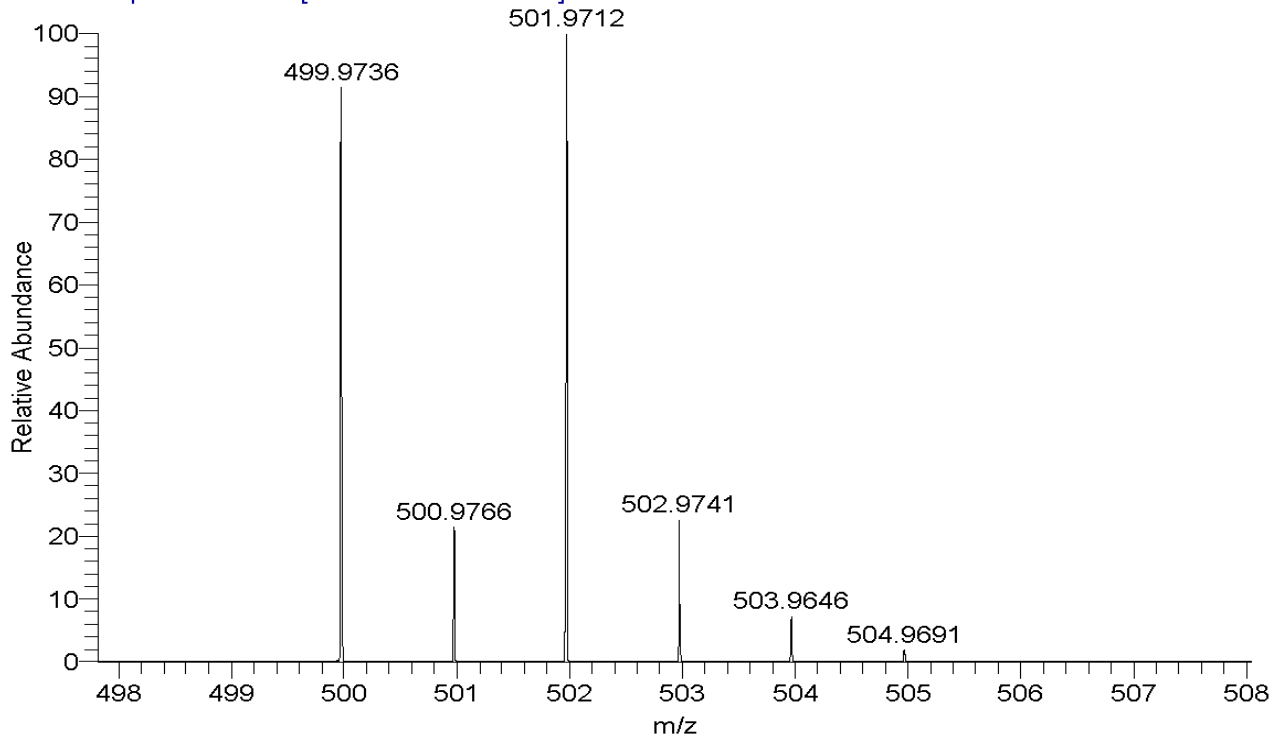

Supporting Information

**Synthesis of 2-(5-(4-chlorobenzylidene)-2,4-dioxothiazolidin-3-yl)-N-(4-phenylthiazol-2-yl)acetamide (HB163)**

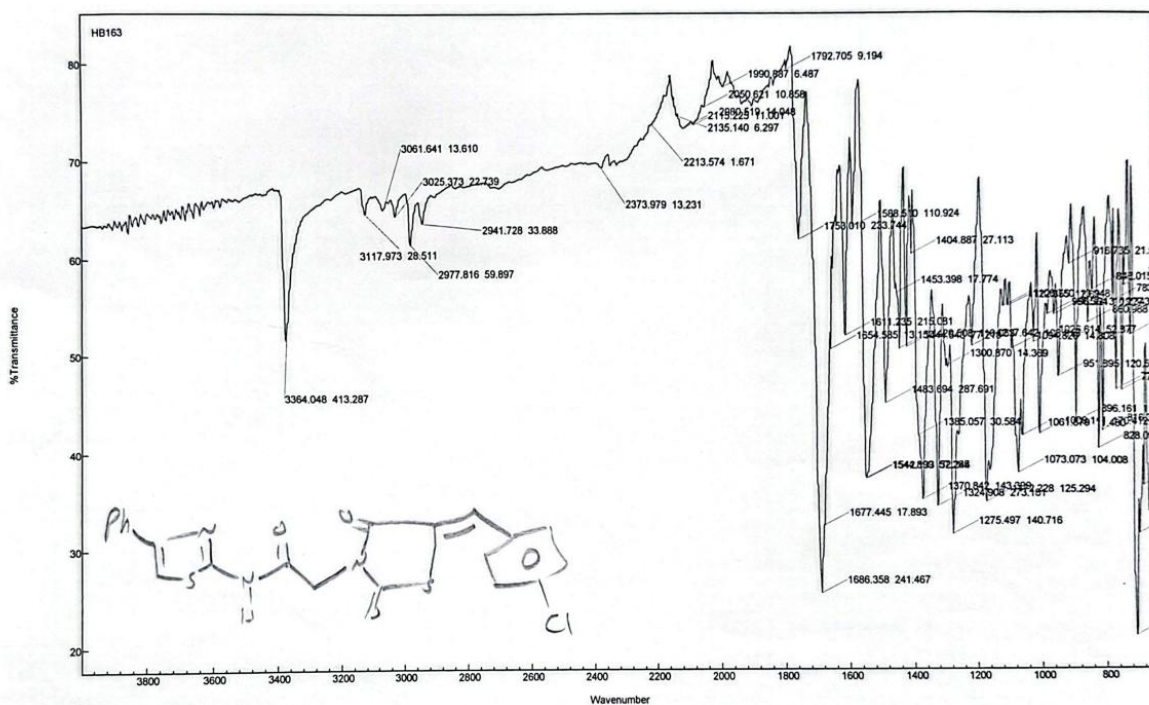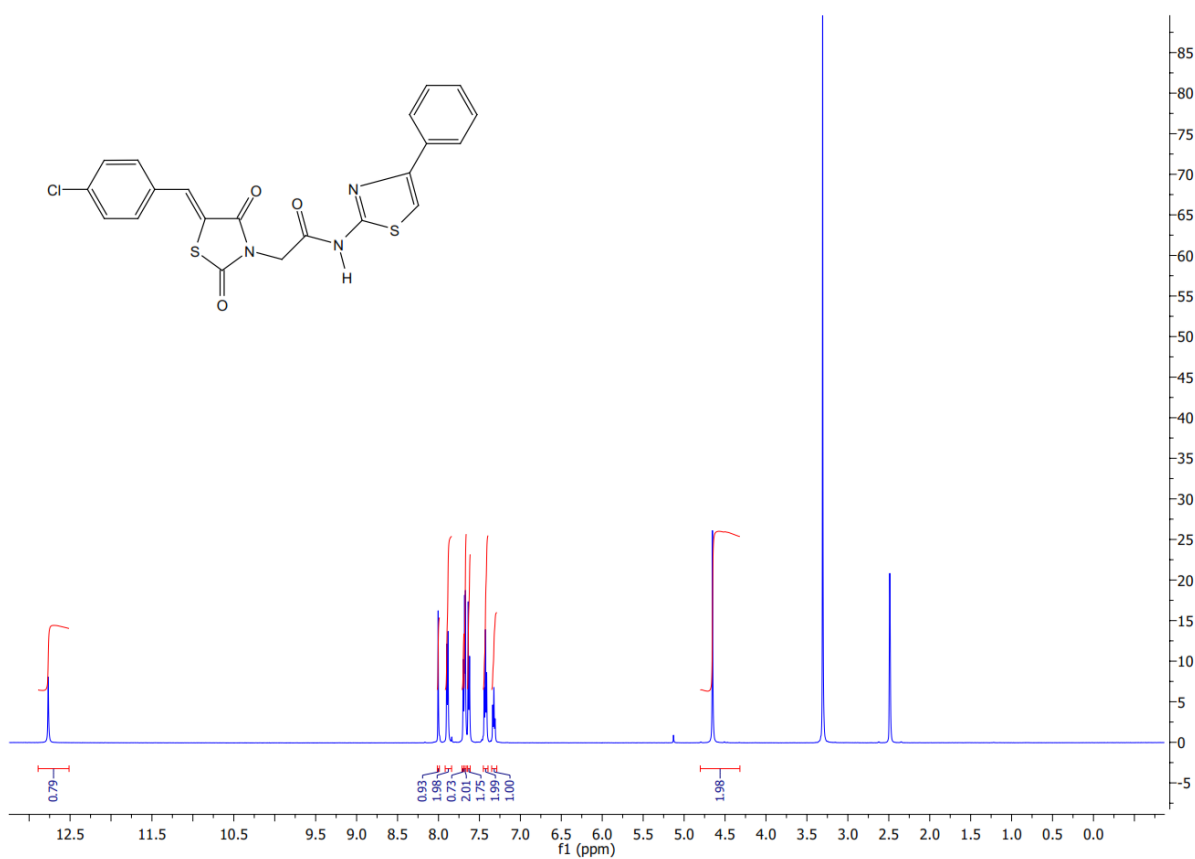

# Supporting Information

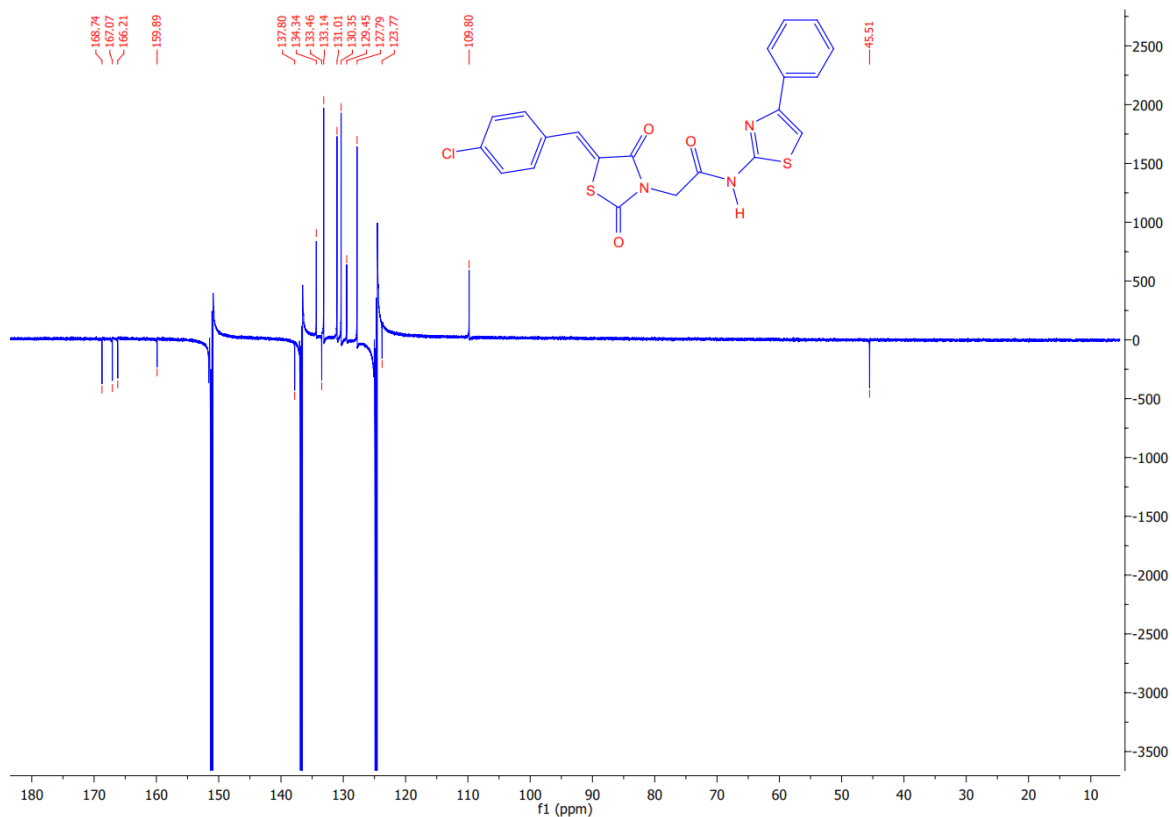

HB163\_20240116093205 #1-100 RT: 0.00-0.45 AV: 100 NL: 4.37E6  
T: FTMS + p ESI Full ms [150.0000-2000.0000]

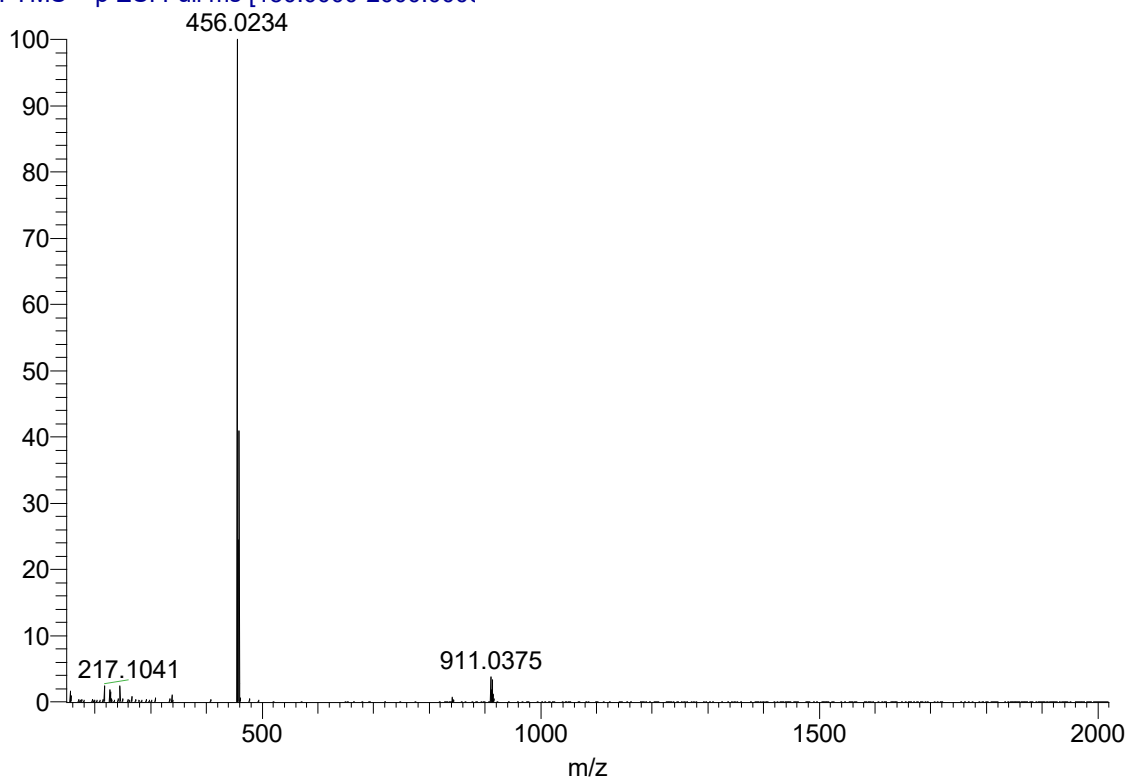

# Supporting Information

HB163\_20240116093205 #1-100 RT: 0.00-0.45 AV: 100 NL: 4.37E6  
T: FTMS + p ESI Full ms [150.0000-2000.0000]

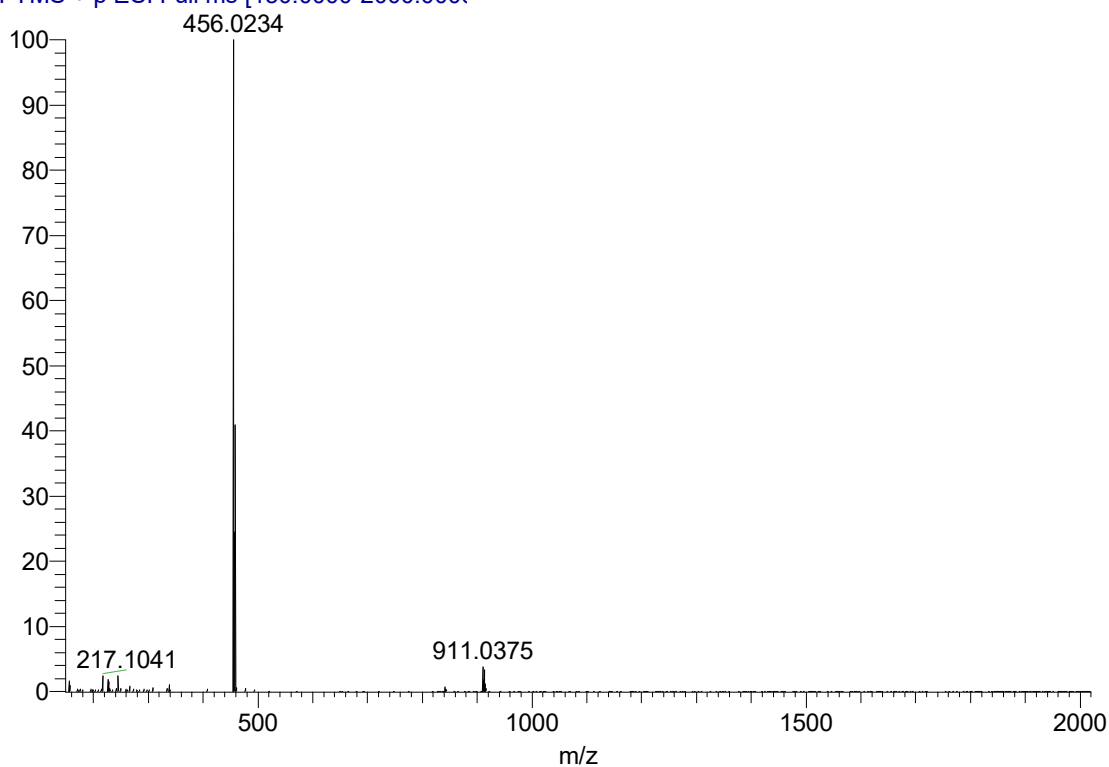

HB163\_20240116093205 #1-100 RT: 0.00-0.45 AV: 100 NL: 4.37E6  
T: FTMS + p ESI Full ms [150.0000-2000.0000]

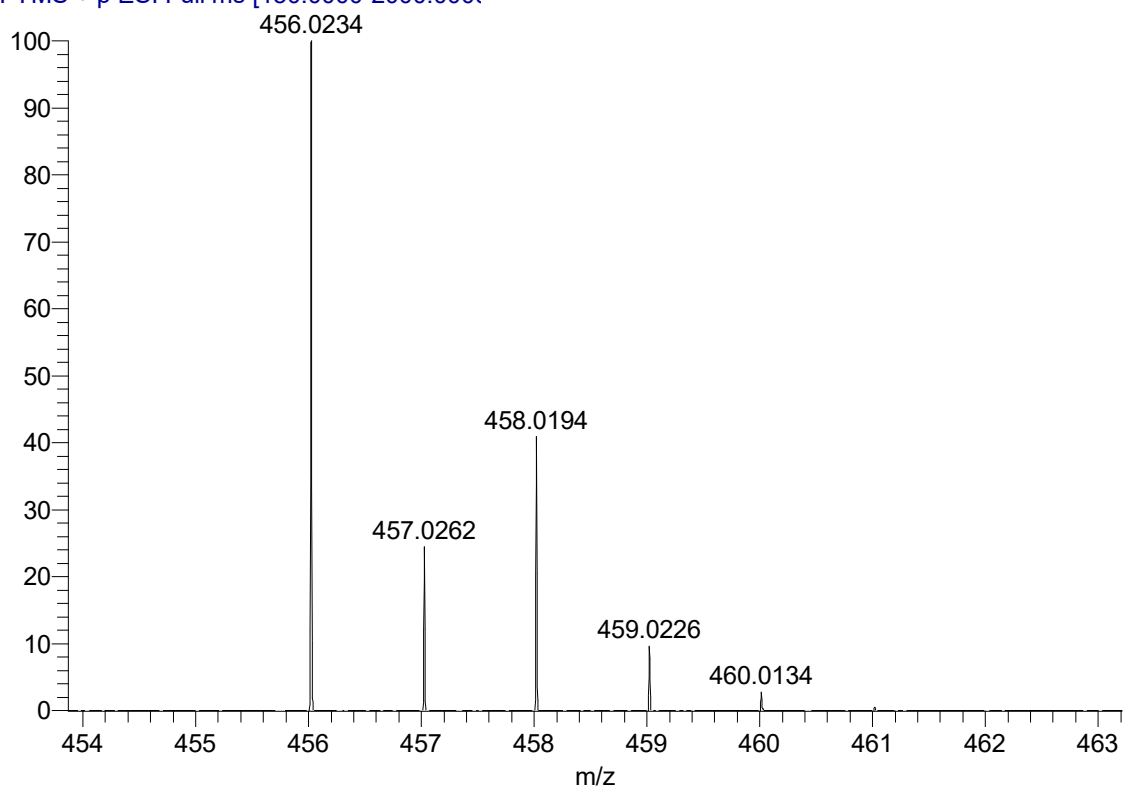



# Supporting Information

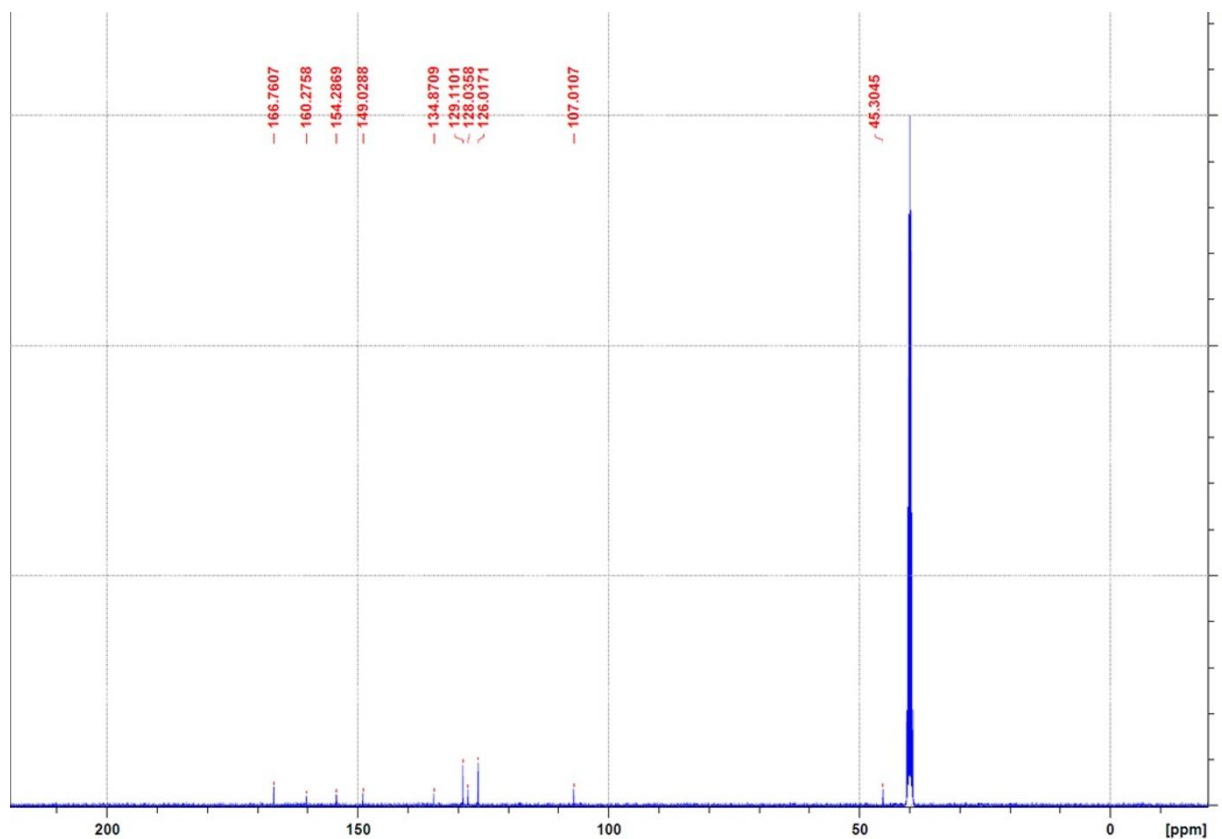

HB121 #1-100 RT: 0.00-0.45 AV: 100 NL: 1.48E8  
T: FTMS + p ESI Full ms [150.0000-2000.0000]

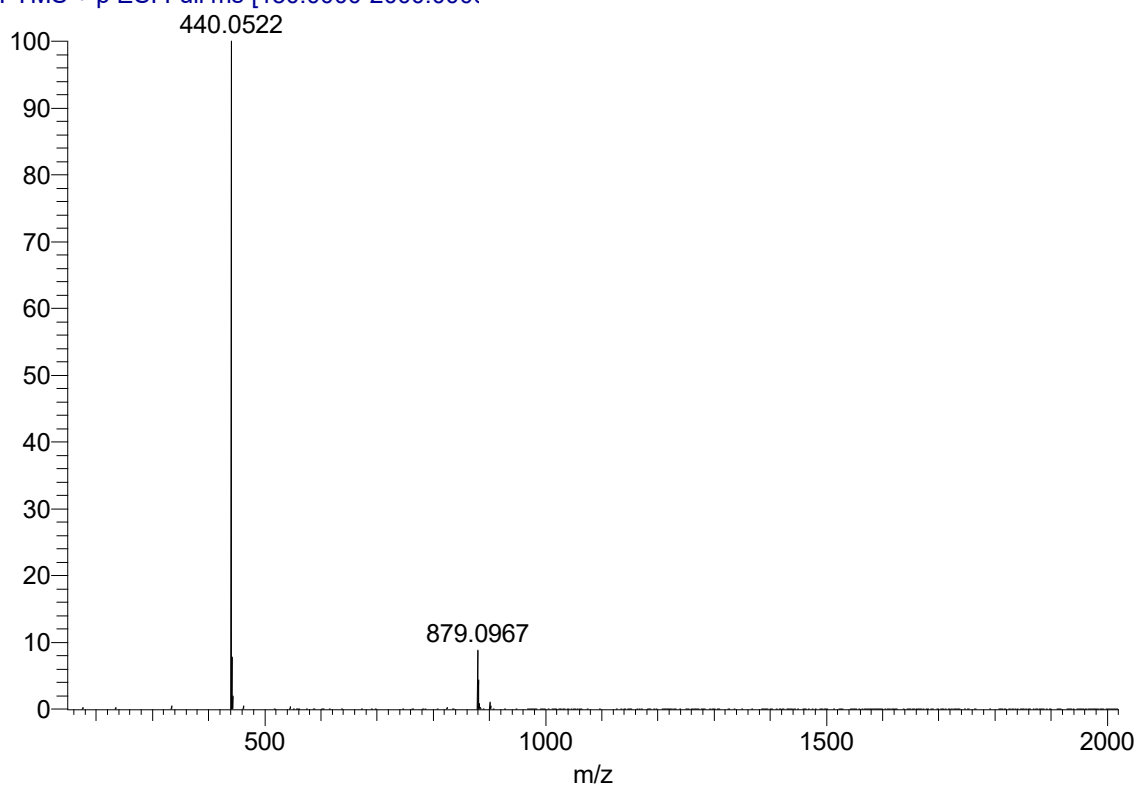

# Supporting Information

HB121 #1-100 RT: 0.00-0.45 AV: 100 NL: 1.48E8  
T: FTMS + p ESI Full ms [150.0000-2000.0000]

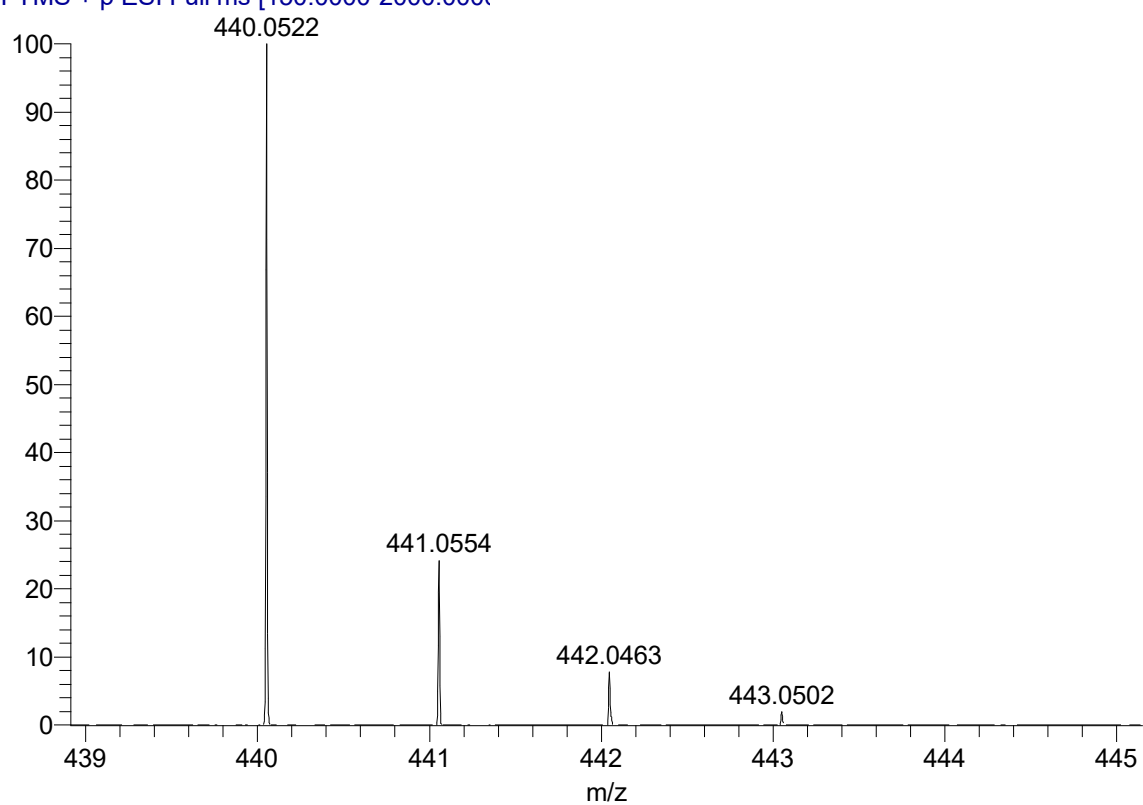

# Supporting Information

## 2-(2,4-dioxo-5-(pyridin-2-ylmethylene)thiazolidin-3-yl)-N-(4-phenylthiazol-2-yl)acetamide (HB123)

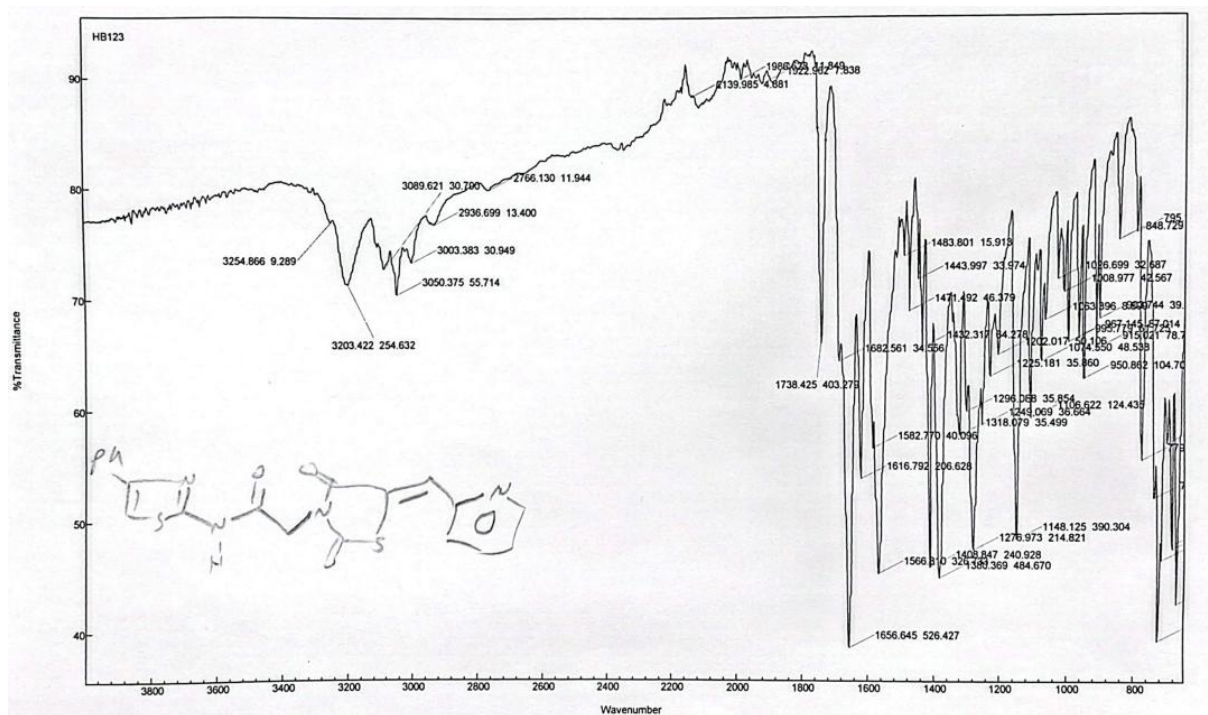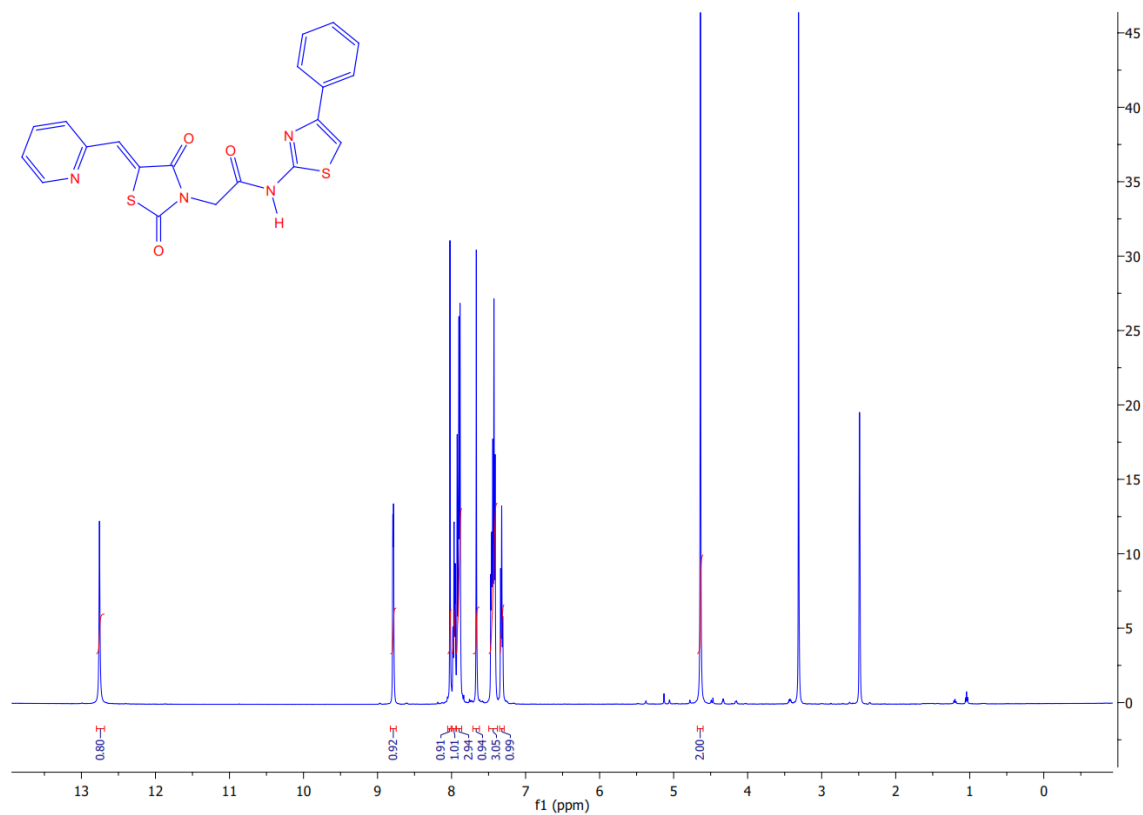

# Supporting Information

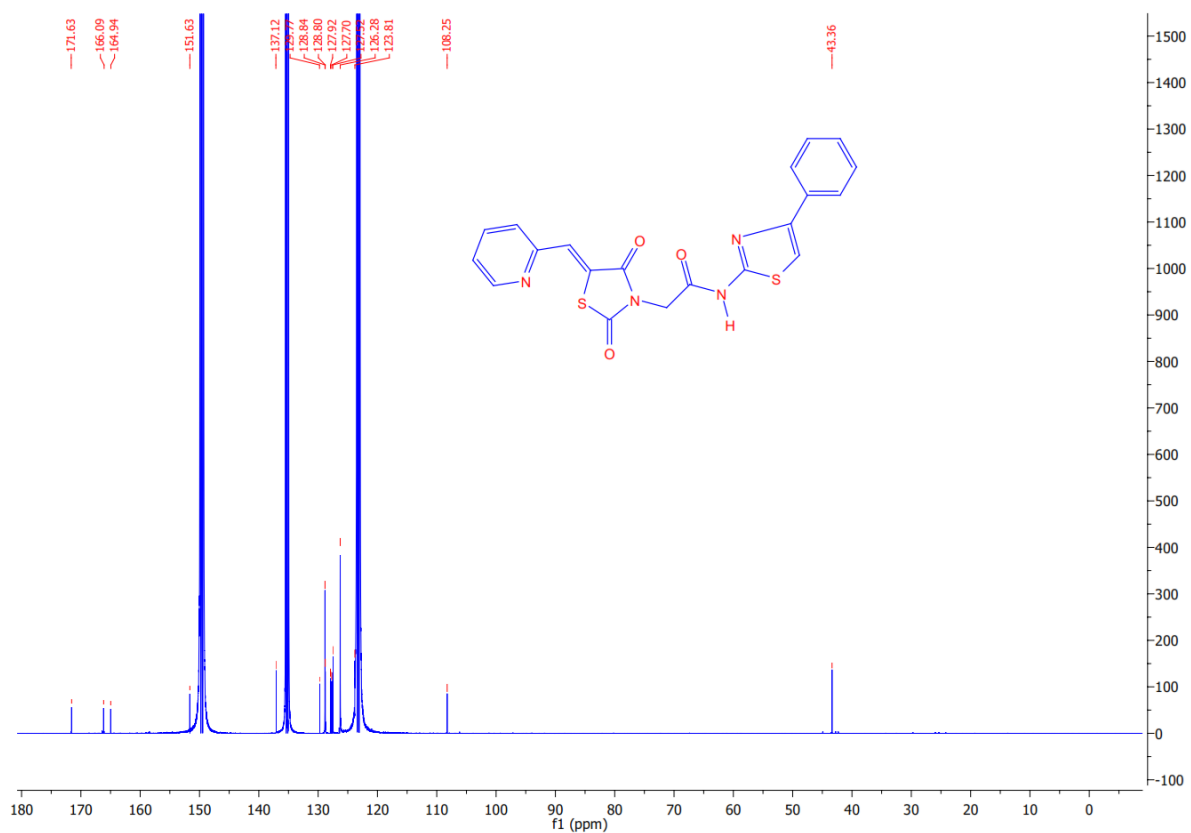

HB123 #1-100 RT: 0.00-0.45 AV: 100 NL: 2.35E8  
T: FTMS + p ESI Full ms [150.0000-2000.0000]

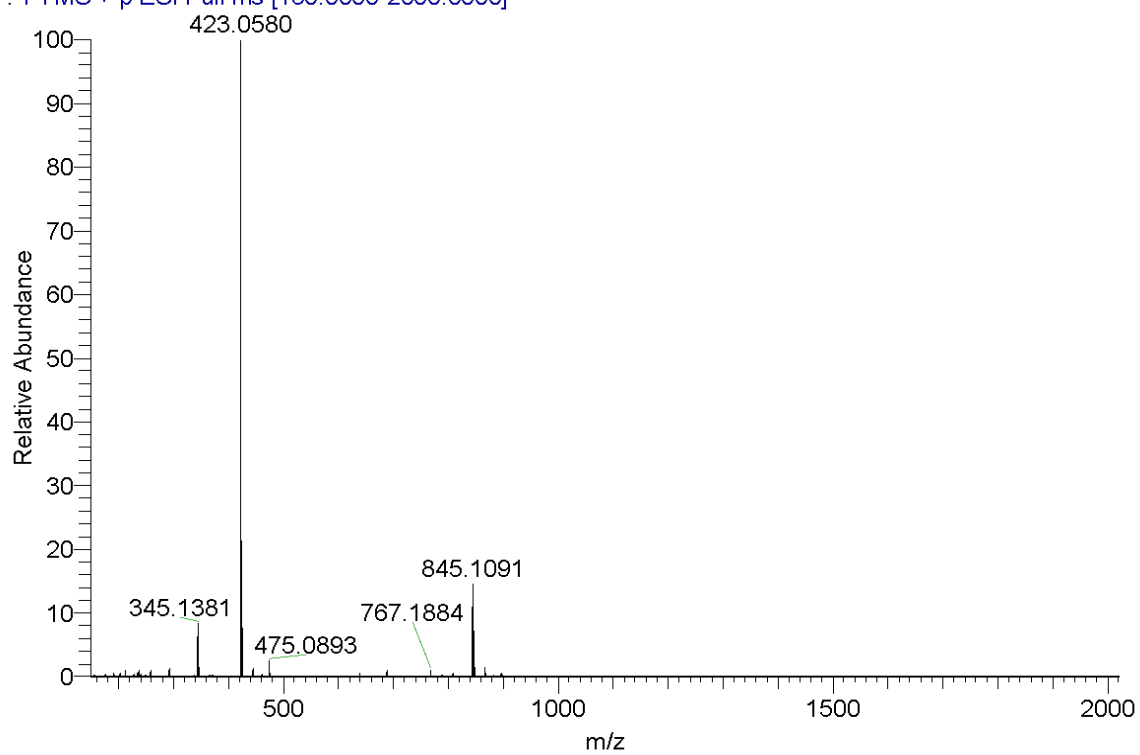

# Supporting Information

HB123 #1-100 RT: 0.00-0.45 AV: 100 NL: 2.35E8  
T: FTMS + p ESI Full ms [150.0000-2000.0000]

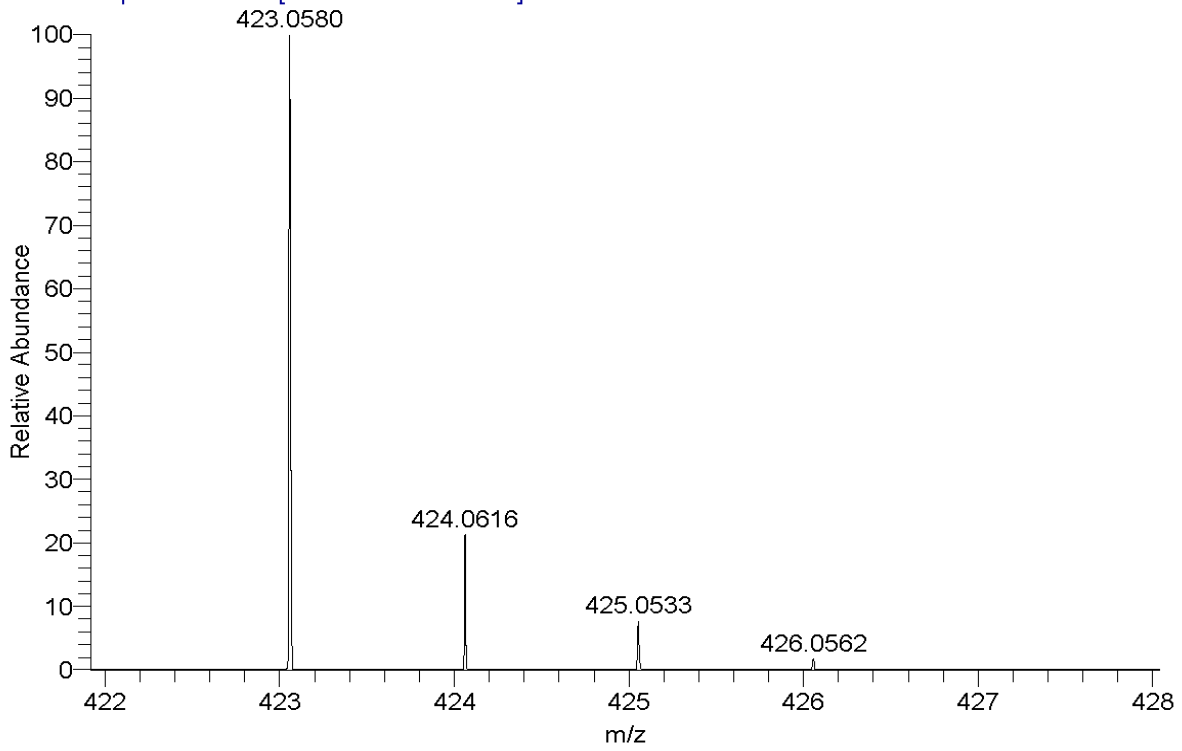

Spectrum RT 0:31 - 1:08 (71 scans) - Background Subtracted 0:05 - 0:28  
Alaasar-HB123-2\_Scan1\_is1.datx 2025.01.15 09:12:14 ;  
ESI - Max: 4.9E7

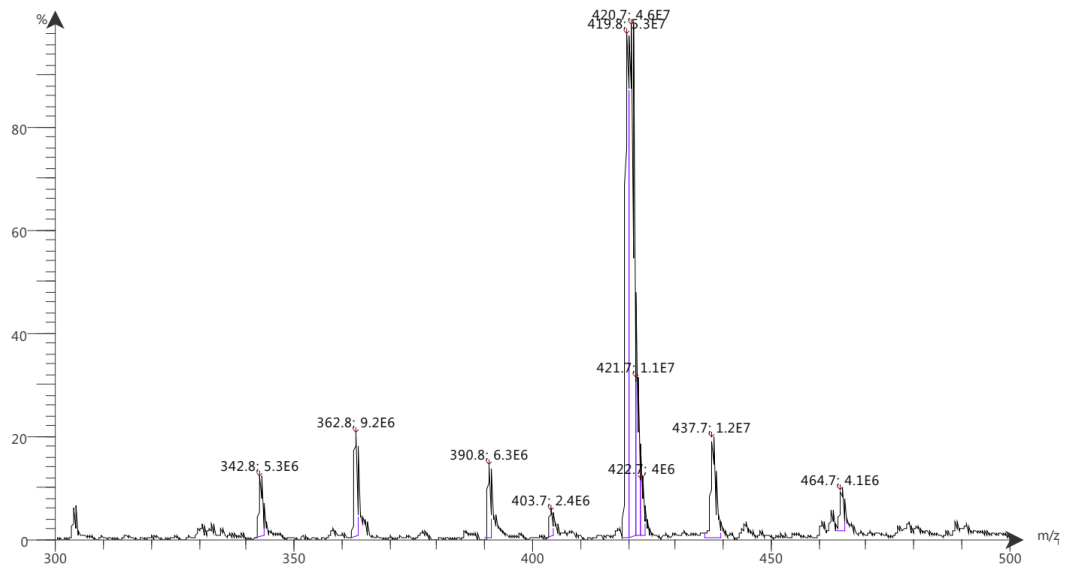

Biological Data

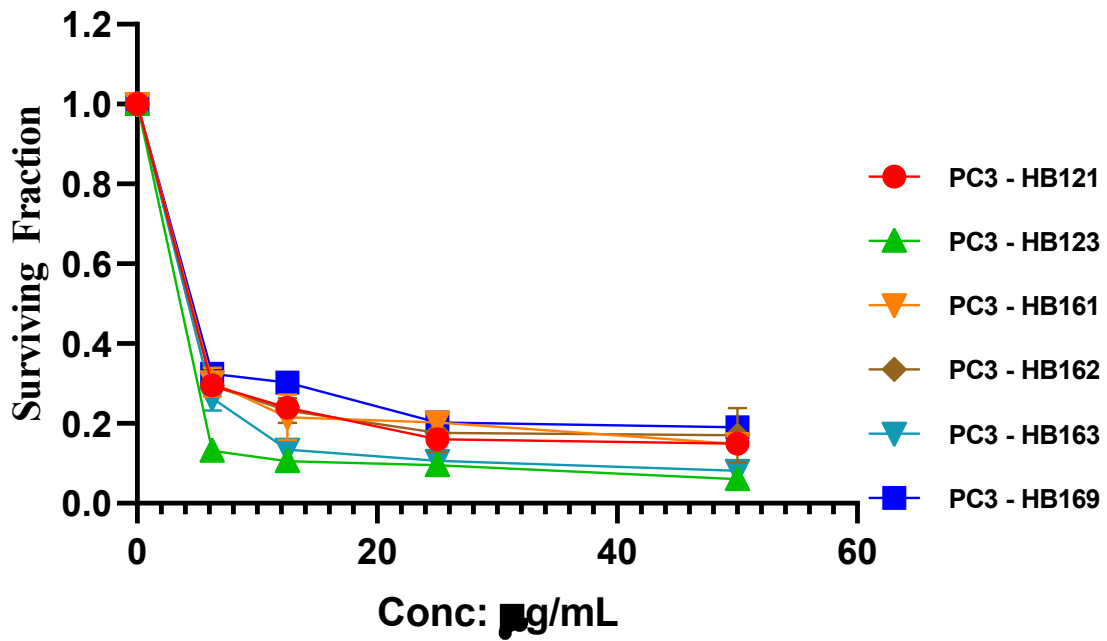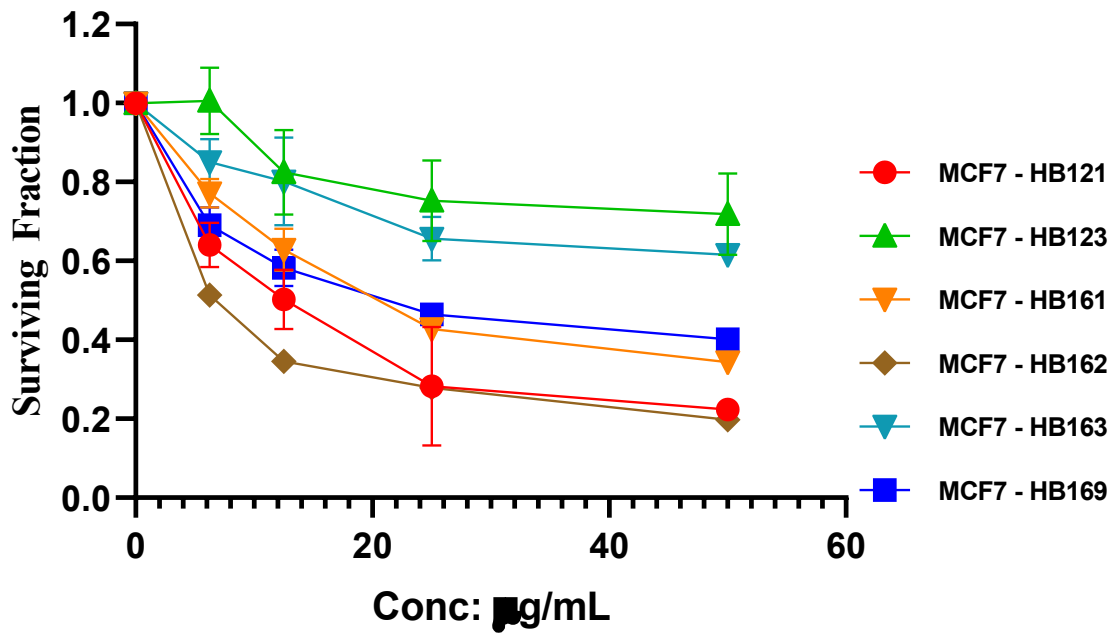

Supporting Information

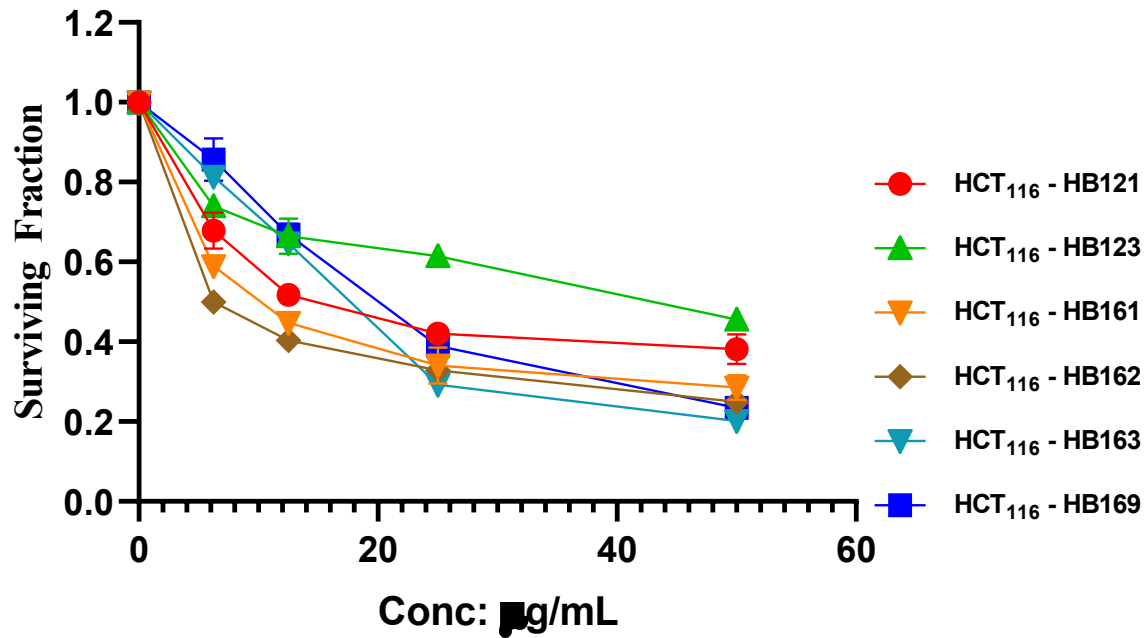

Detailed representations of the IC<sub>50</sub> calculation curves of each tested cell line with the evaluated new analogues (HB121–HB169).

# Supporting Information

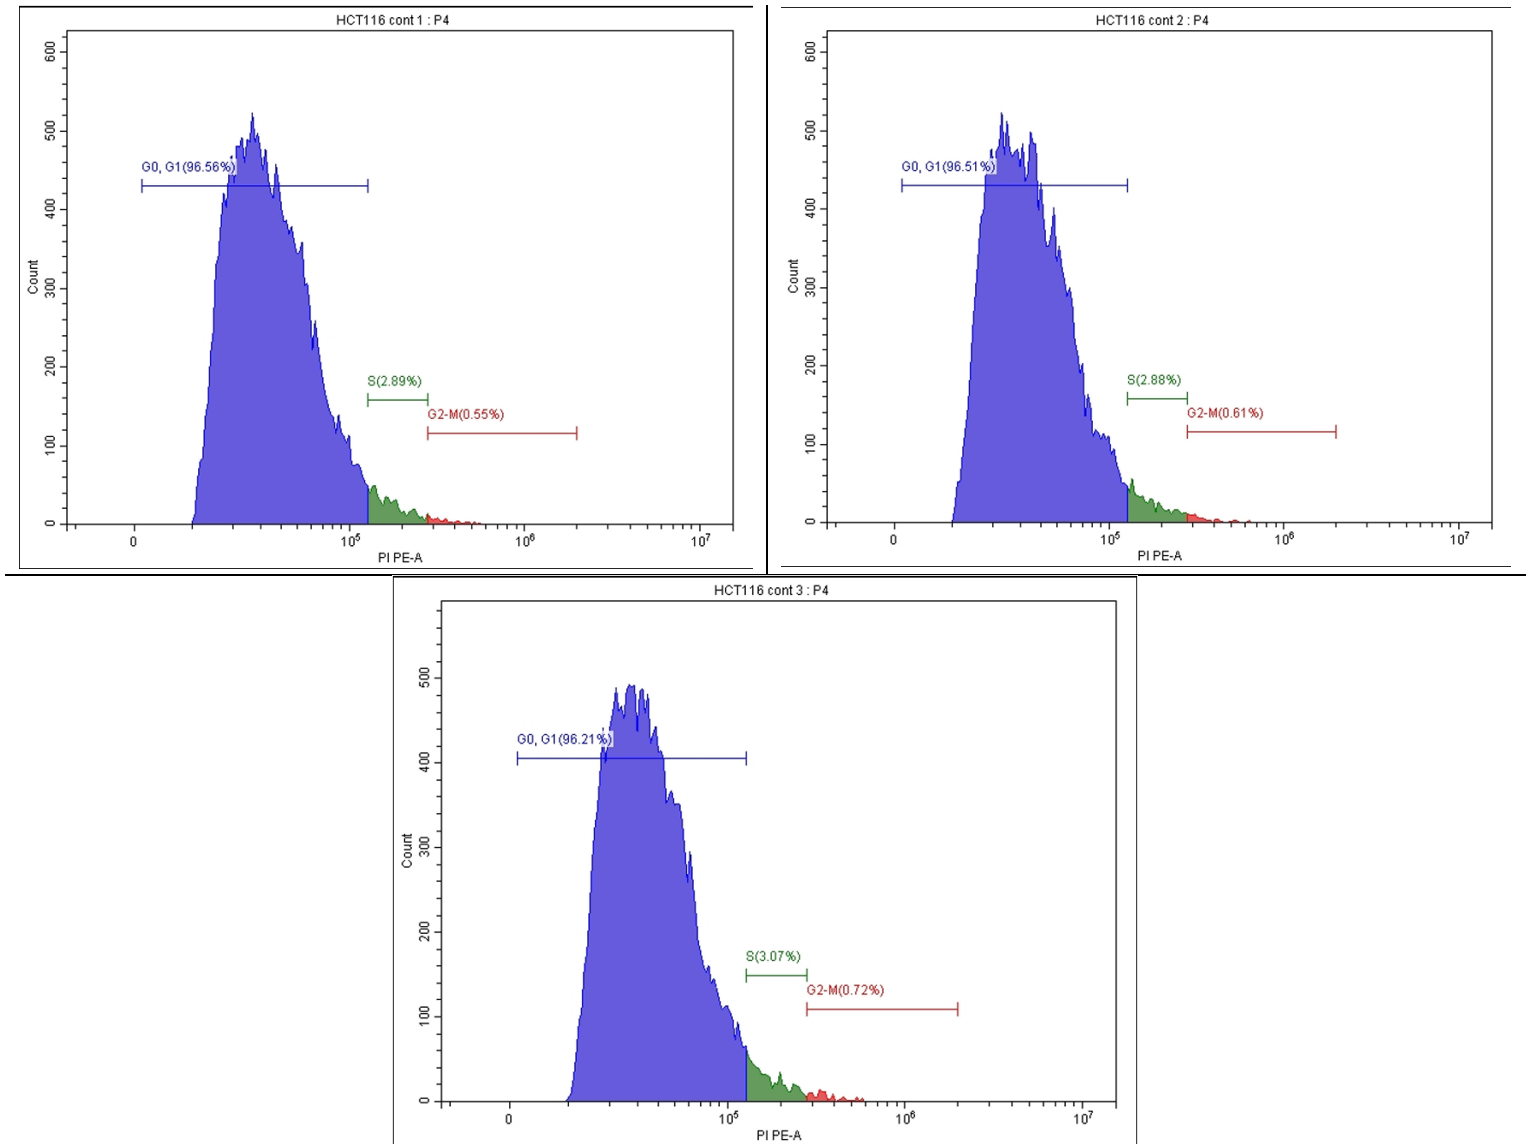

**Figure S1.** The triplicate experiments of the cell cycle analysis histogram of the untreated control HCT<sub>116</sub> cancer cell line.

## Supporting Information

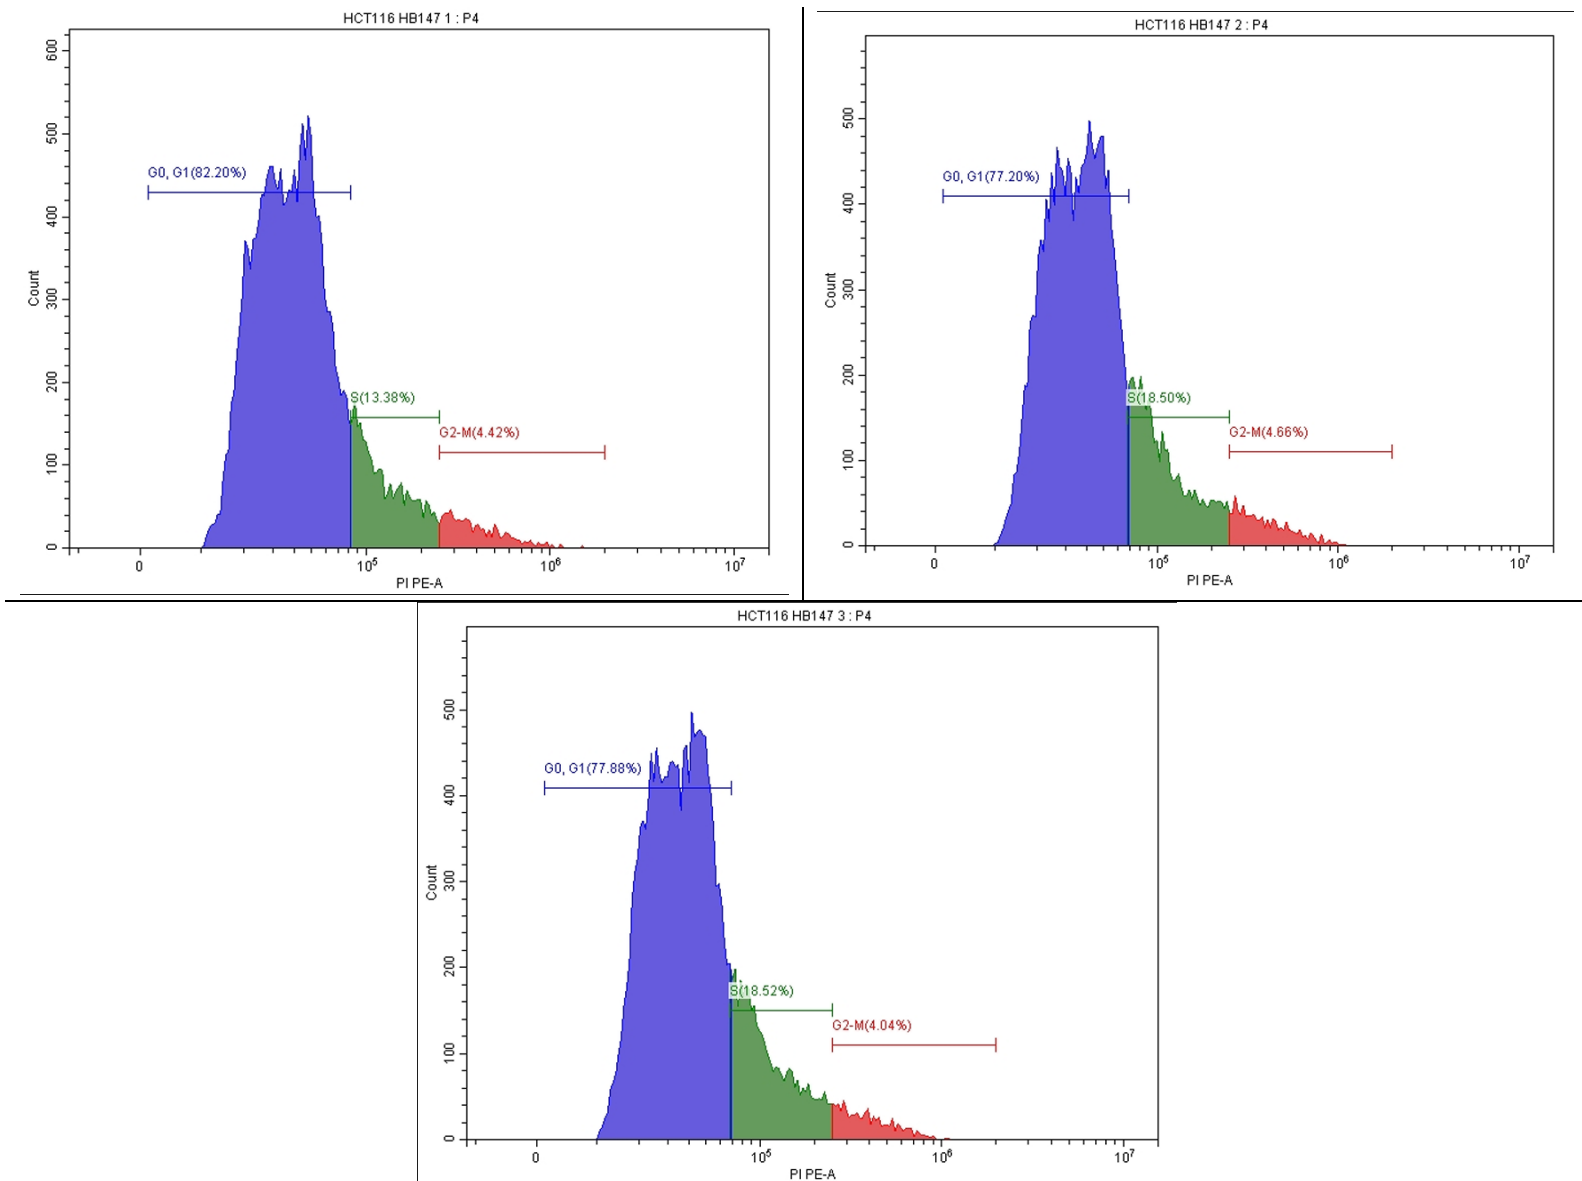

**Figure S2.** The triplicate experiments of the cell cycle analysis histogram of the **HB147**-treated HCT<sub>116</sub> cancer cell line.

## ADMET and Physicochemical Studies

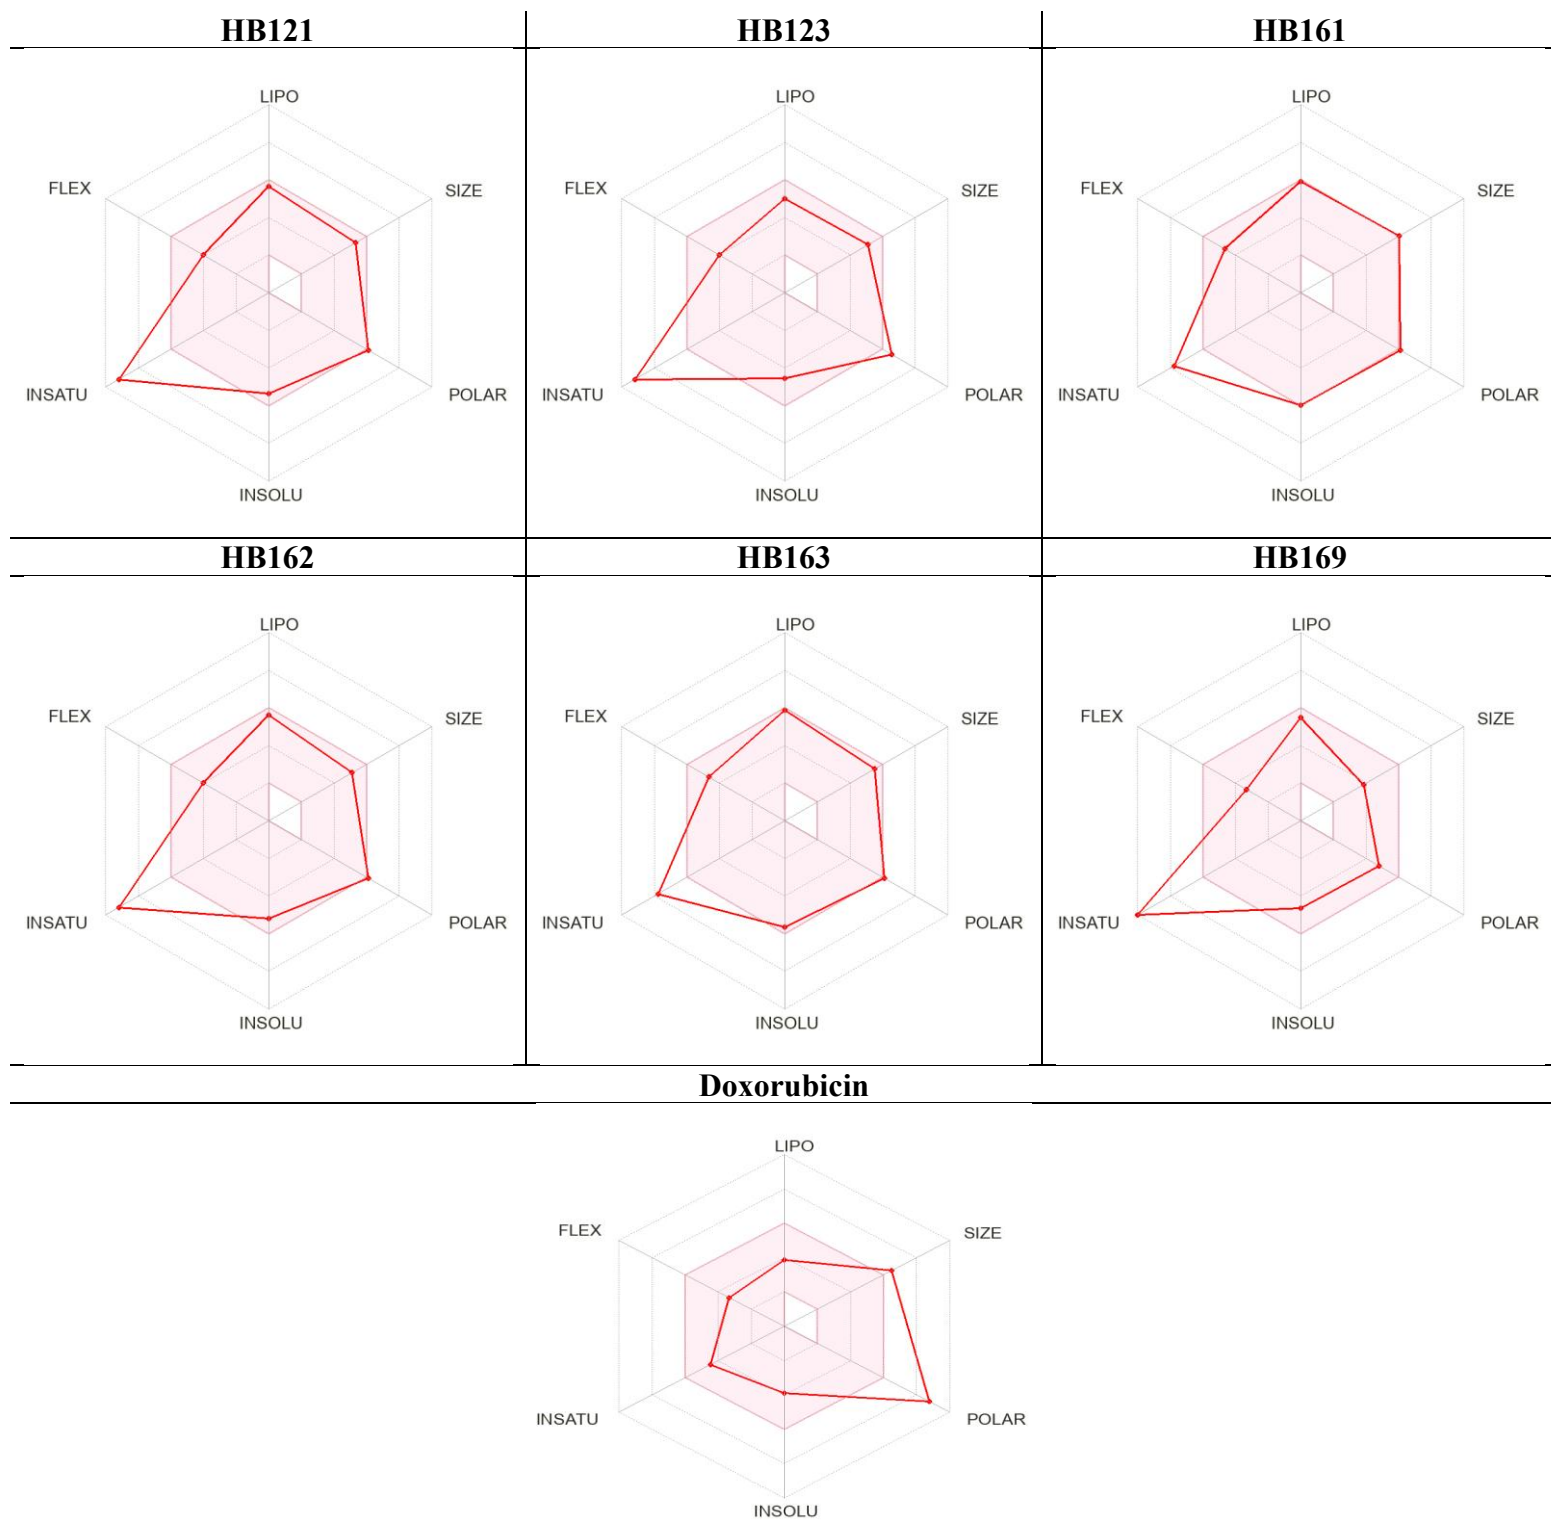

**Figure S3.** Radar bioavailability for the studied compounds (**5c** and **5f**), along with doxorubicin, in which the area in pink displays the specific property optimal range. (LIPO = lipophilicity

## Supporting Information

expressed as XLOGP3 (range from -0.7 to 5.0). SIZE = size expressed as molecular weight (range from 150 g/mol to 500 g/mol). POLAR = polarity expressed as TPSA (topological polar surface area) (range from 20 Å<sup>2</sup> to 130 Å<sup>2</sup>). INSOLU = water insolubility by log S (ESOL) (range from -6 to 0). INSATU = insaturation expressed as for each carbon fraction in sp<sup>3</sup> hybridization (range from 0.25 to 1). FLEX = flexibility, expressed as the number of rotatable bonds (range from 0 to 9).

### References

1. E. O. Olawode, R. Tandlich, E. Prinsloo, M. Isaacs, H. Hoppe, R. Seldon, D. F. Warner, V. Steenkamp and P. T. Kaye, *ARKIVOC*, 2018, **2018**, 110-118.
2. G. Yan, L. Hao, Y. Niu, W. Huang, W. Wang, F. Xu, L. Liang, C. Wang, H. Jin and P. Xu, *European journal of medicinal chemistry*, 2017, **137**, 462-475.
3. C. Nitsche, V. N. Schreier, M. A. Behnam, A. Kumar, R. Bartenschlager and C. D. Klein, *Journal of Medicinal Chemistry*, 2013, **56**, 8389-8403.
